# Supplementary material
Source: PubMed Central journal article supplement (PMC6142956)
Supplement: jamainternmed-178-1174-s001.pdf [file jamainternmed-178-1174-s001.pdf]

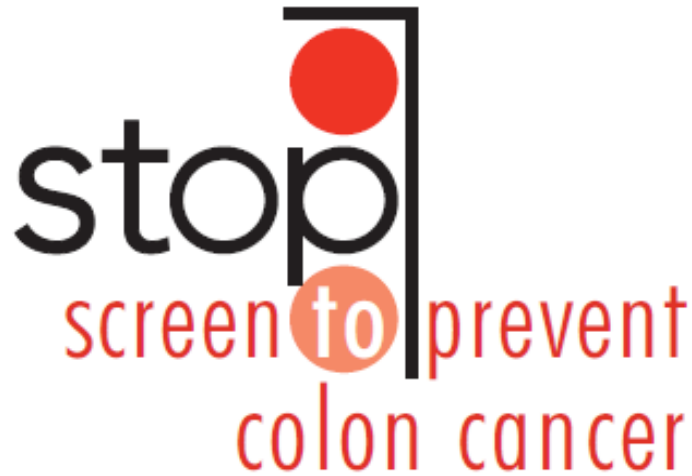

**Strategies and Opportunities to STOP Colon Cancer**

**In Priority Populations (STOP CRC)**

**Protocol 001**

**September 9, 2013**

**NIH Common Fund, National Cancer Institute (NCI)**

**UH2 AT007782-01**

**Kaiser Permanente Northwest**

**The Center for Health Research (CHR)**

**Group Health Cooperative (GHC)**

**OCHIN (OCHIN)**

Protocol 001 Revision dates

September 27, 2013

Updated July 15, 2014

Updated January 13, 2015

Updated February 19, 2015

Updated March 24, 2015

Updated April 13, 2016

Updated April 26, 2016

Updated November 10, 2017

26

| PRINCIPAL INVESTIGATORS                                                                                                                                                                                                                                                                                            |                                                                                                                                                                                                                                                                                                                                                        |
|--------------------------------------------------------------------------------------------------------------------------------------------------------------------------------------------------------------------------------------------------------------------------------------------------------------------|--------------------------------------------------------------------------------------------------------------------------------------------------------------------------------------------------------------------------------------------------------------------------------------------------------------------------------------------------------|
| <p>Gloria D. Coronado, PhD<br/>Senior Investigator</p> <p>Mitch Greenlick Endowed Scientist for Health Disparities<br/>The Center for Health Research</p> <p>Kaiser Permanente Northwest<br/>3800 N. Interstate Avenue<br/>Portland, Oregon 97227</p> <p>Phone: (503) 335-2427<br/>Gloria.D.Coronado@kpchr.org</p> | <p>Beverly B. Green, MD, MPH<br/>Associate Investigator<br/>Group Health Family Physician</p> <p>Group Health Research Institute<br/>1730 Minor Avenue, Suite 1370<br/>Seattle, Washington 98101</p> <p>Phone: (206) 287-2997<br/><a href="mailto:Green.B@GHC.org">Green.B@GHC.org</a>; <a href="mailto:Bev.B.Green@kp.org">Bev.B.Green@kp.org</a></p> |

27

28

29

30 **STOP CRC Project Staff**

| Name                       | Title/ Organization                        | Phone        | Role                                                                                                                                                                                                     |
|----------------------------|--------------------------------------------|--------------|----------------------------------------------------------------------------------------------------------------------------------------------------------------------------------------------------------|
| Scott Fields               | Chief Medical Officer, OCHIN               | 503-943-2521 | Co-Investigator – leads OCHIN team                                                                                                                                                                       |
| Rich Meenan                | Science Director, KP CHR                   | 503-335-2484 | Co-Investigator – leads cost assessment                                                                                                                                                                  |
| Bill Vollmer               | Sr Investigator, KP CHR                    | 503-335-6755 | Co-Investigator – leads data analysis                                                                                                                                                                    |
| Jen Schneider              | Research Associate III, KP CHR             | 503-335-6384 | Co-Investigator – leads qualitative analysis                                                                                                                                                             |
| Sally Retecki              | Community Research Liaison, KP CHR         | 503-335-6320 | Liaison between clinics, clinic staff and CHR. Coordinates the Advisory Board                                                                                                                            |
| Amanda Petrik              | Research Associate II, KP CHR              | 503-335-2483 | Manages budgets and spending plans, and coordinates all data components                                                                                                                                  |
| Jennifer Rivelli           | Project Manager/Research Associate I       | 503-335-2462 | Manages timeline and deliverables, develops project materials, maintains IRB approval, conducts trainings (e.g., MI, audits, etc.), and assists with Spanish qualitative interviews, assists with papers |
| Tanya Kapka                | Physician/Research Associate, VGMH/ KP CHR | 503-601-7400 | Clinician and Research liaison with the VG clinic staff. Assists with project design and implementation.                                                                                                 |
| Jen Coury                  | Communications, KP CHR                     | 503-335-6341 | Edits study documents including training manuals and reports                                                                                                                                             |
| Lisa Fox and Lin Neighbors | Graphics, KP CHR                           | 503-335-2430 | Graphic designers                                                                                                                                                                                        |
| Jon Puro                   | Data Specialist-, OCHIN                    | 503-943-2500 | Technical and architectural lead                                                                                                                                                                         |
| Thuy Le                    | Data Analyst, OCHIN                        |              | Analyst                                                                                                                                                                                                  |
| Joy Woodall                | Research Associate, OCHIN                  | 503-943-2500 | Study coordinator, manages day to day operations at OCHIN.                                                                                                                                               |
| Josue Aguirre              | EHR Site Specialist, VGMHC                 | 971-217-3200 | Technical lead and clinic liaison between Multnomah County and CHR/OCHIN                                                                                                                                 |

31

32

33

34 **TABLE OF CONTENTS**

35 **1 OPERATIONAL PLAN FOR IMPLEMENTATION .....1**

36 **1.1 Study Summary ..... 1**

37 **1.2 Overall Phase 1 Trial Design ..... 1**

38 **1.3 Overall Phase 2 Project Design ..... 2**

39 **1.4 Clinic Activities ..... 2**

40 **1.5 Delivering the Intervention ..... 7**

41 1.5.1 Randomizing Clinics and Selecting Clinic Launch Dates ..... 8

42 1.5.2 Pre-launch period [3-months prior to launch]: ..... 8

43 **1.6 Training Materials..... 9**

44 **1.7 Launch..... 9**

45 **1.8 Improvement Cycles ..... 11**

46 **1.9 Maintenance ..... 11**

47 **1.10 Advisory Board ..... 12**

48 **1.11 Participating clinics ..... 13**

49 1.11.1 Clinic eligibility criteria ..... 13

50 1.11.2 Clinic Recruitment Procedures ..... 14

51 **1.12 Selection of Eligible Patients ..... 14**

52 **1.13 Enrollment Procedures and Participant Identification..... 16**

53 **1.14 Intervention Delivery and Core Components ..... 16**

54 **2 STATISTICAL ANALYSIS PLAN .....17**

55 **2.1 Study Design..... 17**

56 **2.2 Randomization ..... 18**

57 **2.3 Study Outcomes ..... 18**

58 2.3.1 Primary Outcome Variable ..... 18

59 2.3.2 Secondary Outcomes..... 18

60 2.3.3 Process Outcomes ..... 18

61 2.3.1 Assessment of adoption ..... 19

62 2.3.2 Moderator Variables ..... 20

63 **2.4 Analysis ..... 21**

64 2.4.1 Primary and Secondary Outcome Analysis..... 21

65 2.4.2 Analysis of Process Data ..... 23

66 2.4.3 Moderator analysis..... 23

67 2.4.4 Power and Sample Size..... 23

68 2.4.5 Cost Analysis..... 24

69 **2.5 Qualitative Data ..... 28**

70 **2.6 Data Auditing and Validation ..... 30**

|    |            |                                                                         |           |
|----|------------|-------------------------------------------------------------------------|-----------|
| 71 | 2.6.1      | Chart Audits of Participating Clinic Organizations.....                 | 30        |
| 72 | 2.6.2      | Comparison of Claims Data and EHR Data for CRC Screening Outcomes ..... | 33        |
| 73 | 2.6.3      | Capture of CRC screening in Health Maintenance .....                    | 34        |
| 74 | <b>2.7</b> | <b>Description of Data Sources .....</b>                                | <b>34</b> |
| 75 | 2.7.1      | Electronic Data from OCHIN .....                                        | 35        |
| 76 | 2.7.2      | Data Transfer Procedures.....                                           | 35        |
| 77 | <b>3</b>   | <b>DISSEMINATION PLAN .....</b>                                         | <b>36</b> |
| 78 | <b>3.1</b> | <b>Intervention Materials .....</b>                                     | <b>37</b> |
| 79 | <b>3.2</b> | <b>Implementation Guide and Web-based Toolkit .....</b>                 | <b>37</b> |
| 80 | <b>3.3</b> | <b>Dissemination of Research Findings .....</b>                         | <b>38</b> |
| 81 | <b>4</b>   | <b>APPENDIX:.....</b>                                                   | <b>38</b> |
| 82 | <b>4.1</b> | <b>Workflow Diagrams from Virginia Garcia .....</b>                     | <b>38</b> |
| 83 | <b>4.2</b> | <b>Research Reports.....</b>                                            | <b>41</b> |
| 84 | 4.2.1      | Patient Eligibility Table .....                                         | 41        |
| 85 | 4.2.2      | Monthly Activity Summary .....                                          | 42        |
| 86 | 4.2.3      | Final Disposition Status .....                                          | 43        |
| 87 | 4.2.4      | Patient Eligibility and Outcomes in CONTROL Clinics.....                | 45        |
| 88 |            |                                                                         |           |

## 89 **1 Operational Plan for Implementation**

### 90 **1.1 Study Summary**

91 This protocol describes Strategies and Opportunities to STOP Colorectal Cancer in Priority Populations,  
92 STOP CRC, a cluster-randomized pragmatic study designed to increase rates of colorectal cancer (CRC)  
93 screening in safety-net primary care practices. STOP CRC is a collaboration of The Center for Health  
94 Research at Kaiser Permanente Northwest (CHR), Group Health Cooperative Research Institute, and OCHIN,  
95 the nation’s largest network of safety-net practices. OCHIN-member clinics are linked by the same  
96 electronic health record (EHR). Our overall goal is to increase CRC screening rates in large numbers of  
97 diverse patients by devising and testing an intervention that uses a low-cost fecal test. We plan do this in  
98 partnership with 24 OCHIN-member clinics. This project promotes the use of fecal immunochemical testing  
99 (FIT) for colorectal cancer screening, as it has been shown to be an effective population-based strategy for  
100 increasing CRC screening rates. While colonoscopy is recommended by some professional organizations, it may  
101 not be optimal for primary screening as serious adverse complications are not uncommon (1 in 250), endoscopic  
102 capacity is limited, procedure costs are high, access is limited, and many patients prefer alternative tests,  
103 particularly for some minority groups.(1,2) For these reasons, STOP emphasizes primary screening using fecal  
104 testing, with colonoscopy follow-up for positive tests.

105  
106 The primary objectives in STOP CRC are the following:

107 **Primary Aim 1.** Assess the effectiveness of a large-scale, two-arm CRC screening program among  
108 diverse Federally Qualified Health Center (FQHC) patients and assess differences in CRC screening  
109 outcomes across patient subgroups – e.g. age, sex, insurance status, Hispanic ethnicity/race. The  
110 intervention will consist of:

- 111 • An automated data-driven, EHR-linked program for mailing FIT kits (with linguistically appropriate  
112 pictographic instructions and return postage) to patients due for CRC screening

113 **Primary Aim 2.** Assess the costs and long-term cost-effectiveness of the automated program.

114 The secondary objectives are to:

115 **Secondary Aim 1.** Assess adoption, implementation, reach and potential maintenance and spread of  
116 the program, using a mixed-method rapid assessment process, field notes, and other ethnographic  
117 data.

118 **Secondary Aim 2.** Adapt and pilot-test the adaptation of STOP CRC in an alternate EHR platform,  
119 *Allscripts*, and develop an implementation guide to assists sites in adopting the program.

120

### 121 **1.2 Overall Phase 1 Trial Design**

122 This two-phase project seeks to raise participation in CRC screening among patients who receive care at  
123 FQHCs. In Phase 1, we pilot-tested the STOP intervention in two clinics of the Virginia Garcia Memorial  
124 Health Center. In one clinic, we mailed an introductory letter, FIT kit, and reminder to about 100 patients.  
125 This intervention is called the Auto Intervention. In a second clinic, we mailed to about 100 patients all  
126 those items and conducted additional outreach designed by the clinic (i.e. live phone call outreach). This  
127 intervention is called the Auto Plus Intervention. We identified patients age-eligible for CRC screening, and  
128 used the electronic health record to code patients’ receipt of CRC screening, test results, and related  
129 outcomes. **Figure 1** shows the three-aim trial design that was used in the pilot.

130

131 In Phase 2, we will expand our program to 26 FQHC clinics; 24 primary FQHC clinics and 2 that are affiliated  
132 with an academic medical center. The study will use existing clinic data and will impose few limits on who  
133 can and cannot participate. The STOP program is being designed collaboratively with our OCHIN partners

134 so that it can be implemented and maintained. We will evaluate FIT testing use (primary outcome), and any  
 135 type of CRC screening (as recommended by the US Preventative Services Task Force, USPSTF; secondary  
 136 aim), and whether the program was more or less effective for certain patient subgroups, such as those who  
 137 do or do not have insurance.

138 **1.3 Overall Phase 2 Project Design**

139 The Phase 2 trial design has two arms (intervention vs. usual care), as shown in **Figure 1**. It also adds an  
 140 Improvement step, where clinics evaluate small iterative improvements using a plan-do-study-act cycle  
 141 approach.

142

**Figure 1: STOP CRC Pragmatic Study Design**

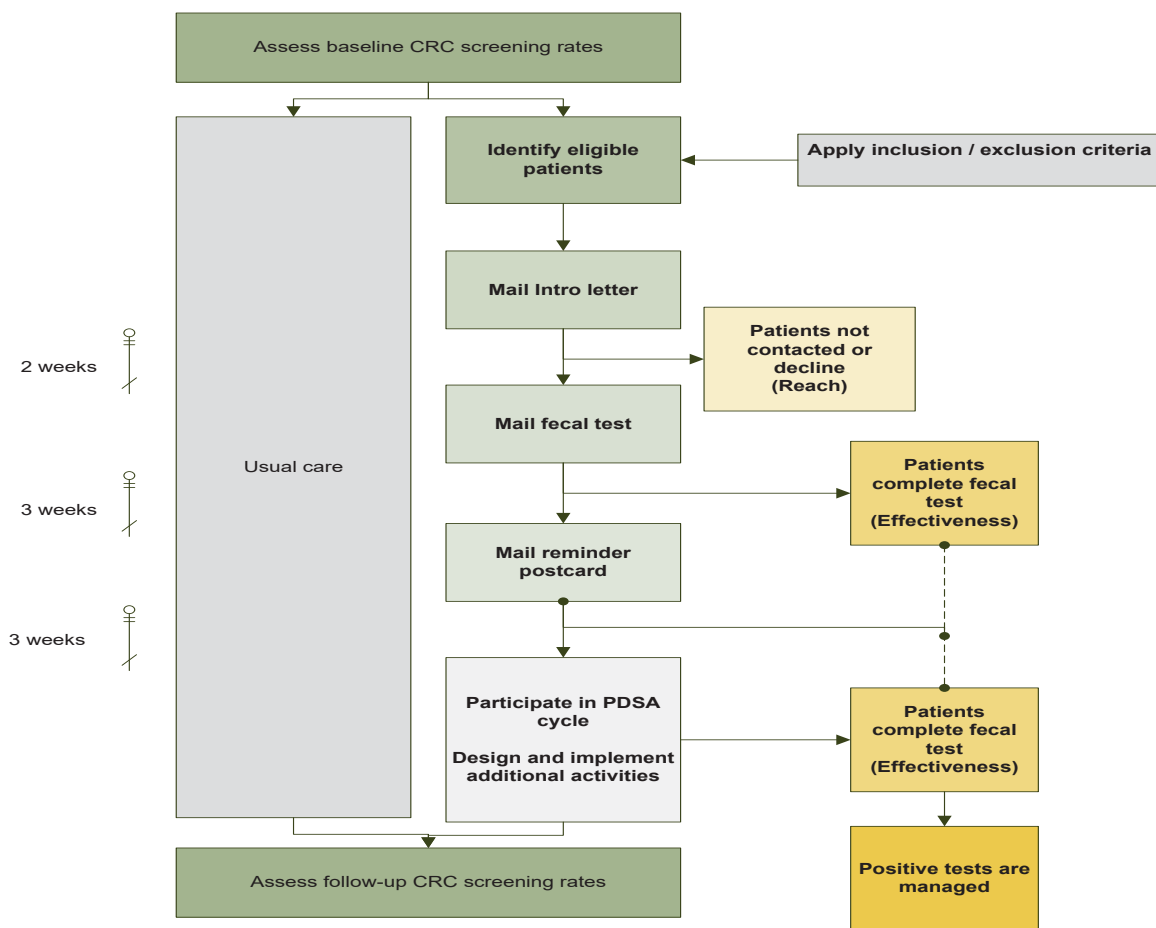

Reach = N patients contacted/ N anticipated  
 Effectiveness = N patients tested/ N anticipated

143 **1.4 Clinic Activities**

144 Because the goal of the STOP program is to transform the way that CRC screening is delivered, the program  
 145 was designed to be sustained. Rather than building a stand-alone tracking system, we built a population  
 146 management system directly into the EHR. The care that patients receive during in- clinic visit will therefore  
 147 complement and reinforce this automated program. For example, a provider will know that a patient has  
 148 been ordered and mailed a kit as part of the program and, during the clinic visit, can remind the patient to  
 149 complete and return their kit. Similarly, if a provider encounters a patient who is a poor candidate for CRC

150 screening s/he can update the Health Maintenance tracking tool in the EHR, which will suspend fecal test  
151 mailings for that patient. The specific workflow that a clinic chooses will vary. In general, incorporating the  
152 STOP activities into established clinic workflows minimizes clinic disruption and training needs.

153  
154 **1.4.1. Identifying eligible patients – inclusion criteria:**

155 We will use the following algorithm to identify eligible patients in our intervention and usual care sites –  
156 based on age and clinic location assignment.

157 Among patients who are age-eligible (aged 50-74) and have had a clinic visit in the past year:

- 158 • We will select patients whose primary location is an intervention clinic.
- 159 • If a patient has no assigned location, we will select patients whose assigned PCP’s default  
160 location is an intervention clinic;
- 161 • If a patient has no assigned location and no assigned PCP, we will include patients if the  
162 provider of their last visit has a default location that is an intervention clinic;
- 163 • Patients who had no clinic visit in the past year will not be included;
- 164 • We will follow this same algorithm for selecting patients in our usual care sites.

165  
166 **1.4.2. Identifying eligible patients – exclusion criteria**

167 We will use the following algorithm to identify eligible patients in our intervention and control sites – based  
168 on history of colorectal cancer screening, and other clinical factors.

169 Among patients who are age-eligible (aged 50-74) and have had a clinic visit in the past year and have a  
170 clinic assignment (See 1.4.1):

- 171 • We will select patients who are due for CRC screening, based on Health Maintenance and  
172 codes in other sections of the medical record. The codes that satisfy Health Maintenance for  
173 CRC screening are as follows:
- 174 • Codes for History of Colorectal Cancer
- 175

| Code  | Description                                                    |
|-------|----------------------------------------------------------------|
| 153   | Malignant neoplasm of colon                                    |
| 153.0 | Malignant neoplasm of hepatic flexure                          |
| 153.1 | Malignant neoplasm of traverse colon                           |
| 153.2 | Malignant neoplasm of descending colon                         |
| 153.3 | Malignant neoplasm of sigmoid colon                            |
| 153.4 | Malignant neoplasm of cecum                                    |
| 153.5 | Malignant neoplasm of appendix vermi formis                    |
| 153.6 | Malignant neoplasm of ascending colom                          |
| 153.7 | Malignant neoplasm of splenic flexure                          |
| 153.8 | Malignant neoplasm of other specified sites of large intestine |
| 153.9 | Malignant neoplasm of colon unspecified site                   |



|        |                                                            |
|--------|------------------------------------------------------------|
| 154.0  | Malignant neoplasm of recto-sigmoid junction               |
| 154.1  | Malignant neoplasm of rectum                               |
| 197.5  | Secondary malignant neoplasm of large intestine and rectum |
| V10.05 | Personal history of malignant neoplasm of large intestine  |

176

177

- Codes for Colonoscopy Screening

| Code  | Description                                                                                                  |
|-------|--------------------------------------------------------------------------------------------------------------|
| 44388 | Colonoscopy through stoma; dx w/wo specimens, brushing/ washing (sep proc)                                   |
| 44389 | Colonoscopy through stoma; w/bx single/multiple                                                              |
| 44390 | Colonoscopy through stoma; w/removal, fb                                                                     |
| 44391 | Colonoscopy through stoma; w/control, bleeding                                                               |
| 44392 | Colonoscopy through stoma; w/removal lesion, hot forceps/cautery                                             |
| 44393 | Colonoscopy through stoma; w/ablation, lesion, not removed by hot forceps/cautery/snare                      |
| 44394 | Colonoscopy through stoma; w/removal, lesion, snare                                                          |
| 44397 | Colonoscopy through stoma; w/transcendoscopic stent placed (w/predelation)                                   |
| 45355 | Colonoscopy, rigid/flexible transabdominal via colostomy, single/multiple                                    |
| 45378 | Colonoscopy, flexible, proximal to splenic flexure; dx, w/wo specimen/colon decomp (sep proc)                |
| 45379 | Colonoscopy, flexible, proximal to splenic flexure; w/removal, fb                                            |
| 45380 | Colonoscopy, flexible, proximal to splenic flexure; w/bx, single/multiple                                    |
| 45381 | Colonoscopy, flexible, proximal to splenic flexure; w/directed submucosa injections, any substance           |
| 45382 | Colonoscopy, flexible, proximal to splenic flexure; w/control, bleeding                                      |
| 45383 | Colonoscopy, flexible, proximal to splenic flexure; w/ablatn lesn, not removed, hot forceps/cautery/snare    |
| 45384 | Colonoscopy, flexible; w/removal, lesion, hot forceps/cautery                                                |
| 45385 | Colonoscopy, flexible; w/removal, lesion, snare                                                              |
| 45386 | Colonoscopy, flexible, proximal to splenic flexure; w/dilation, balloon, 1-> strictures                      |
| 45387 | Colonoscopy, flexible, proximal to splenic flexure; w/transcendoscopic stent placed (w/predelation)          |
| 45391 | Colonoscopy, flexible, proximal to splenic flexure; w/endoscopic US exam                                     |
| 45392 | Colonoscopy, flexible, proximal to splenic flexure; w/transcendoscopic US intr/transmural needle aspirate/bx |
| G0105 | Colorectal cancer screening; colonoscopy on an individual at high risk                                       |
| G0121 | Colorectal cancer screening; colonoscopy on individual not meeting criteria for                              |

178  
179

|  |           |
|--|-----------|
|  | screening |
|--|-----------|

- Codes for FOBT/FIT

| Code   | Description                                                                                                                                                                  |
|--------|------------------------------------------------------------------------------------------------------------------------------------------------------------------------------|
| 82270  | Occult blood by perox activity, 1.3 spec (82270)                                                                                                                             |
| 82271  | Blood, occult, by perox activity (guaiac)                                                                                                                                    |
| 82272  | Blood, occult, by perox activity (guaiac)                                                                                                                                    |
| 82274  | Fecal globin by immunochemistry                                                                                                                                              |
| G0328  | Assay test for blood, fecal                                                                                                                                                  |
| G0394  | Blood occult test (eg. Guaiac) feces, for single determination for colorectal neoplasm (i.e., patient was provided 3 cards or single triple care for consecutive collection) |
| LP1081 | Fecal globin by immunochemistry (Medicare)                                                                                                                                   |
| LP1398 | Fecal occult blood x3 (ncnm lab)                                                                                                                                             |
| LP926  | Occult blood, stool, guaiac x3                                                                                                                                               |
| LS652  | Occult blood, fecal, immunoassay                                                                                                                                             |
| LS885  | Hemoccult/guaiac (colorectal) screen (82270)                                                                                                                                 |
| LS900  | Occult blood stool monoclonal 1                                                                                                                                              |
| LS901  | Occult blood stool monoclonal 2                                                                                                                                              |
| LS 902 | Occult blood stool monoclonal 3                                                                                                                                              |
| LS912  | Occult blood stool monoclonal x3                                                                                                                                             |
| LS932  | Guaiac heme in house (AHTMG)                                                                                                                                                 |
| LS944  | Occult blood, series, first spec                                                                                                                                             |
| LS945  | Series occult blood third specimen                                                                                                                                           |
| Ls990  | Occult blood, series, second spec                                                                                                                                            |
| LS992  | Occult blood stool x1 (lab)                                                                                                                                                  |
| LV1433 | FOBT waived, immunochemical                                                                                                                                                  |
| LV1542 | Occult blood/hemoccult (88272)                                                                                                                                               |
| LV1576 | HP-lab-occult blood (Tahoe Forest)                                                                                                                                           |
| LV1684 | Fecal global by immunochemistry (POCT) 82274                                                                                                                                 |
| LV1687 | Occult blood, fecal, immunoassay, third spec                                                                                                                                 |
| LV1737 | Fecal occult by immunochemistry (82274) POCT                                                                                                                                 |
| LV414  | Fecal globin by immunochemistry (Medicare)                                                                                                                                   |
| LV472  | Occult blood (MTY in-house)                                                                                                                                                  |
| LV510  | Stool occult blood, in-house (82270)                                                                                                                                         |

|       |                                    |
|-------|------------------------------------|
| LV705 | Hemoccult/iFOB test                |
| LV877 | Stool occult blood (CHC in -house) |
| LV908 | Fecal globin- in house (Bend only) |
| LV919 | Fecal occult blood x1 (NCNM lab)   |
| LX063 | Occult blood, stool (diagnostic)   |

180  
181

- Codes for Flexible Sigmoidoscopy

| Code  | Description                                                                                             |
|-------|---------------------------------------------------------------------------------------------------------|
| 45330 | Diagnostic sigmoidoscopy                                                                                |
| 45331 | Sigmoidoscopy and biopsy                                                                                |
| 45332 | Sigmoidoscopy, flexible; w/removal, fb                                                                  |
| 45333 | Sigmoidoscopy, flexible; w/removal, lesion, hot forceps/cautery                                         |
| 45334 | Sigmoidoscopy, flexible; w/control, bleeding                                                            |
| 45335 | Sigmoidoscopy, flexible; w/directed submucosal injections, any substance                                |
| 45337 | Sigmoidoscopy, flexible; w/decompression, volvulous, any method                                         |
| 45338 | Sigmoidoscopy, flexible; w/removal, lesion, snare                                                       |
| 45339 | Sigmoidoscopy, flexible; w/ablation, lesion, not removed by hot forceps/cautery/snare                   |
| 45340 | Sigmoidoscopy, flexible; w/dilation, balloon, 1-> strictures                                            |
| 45341 | Sigmoidoscopy, flexible; w/endoscopic ultrasound exam                                                   |
| 45342 | Sigmoidoscopy, flexible; w/transendoscopic ultrasound guided intra-transmural fine needle aspiration/bx |
| 45345 | Sigmoidoscopy, flexible; w/transendoscopic stent placed (w/predelation)                                 |
| G0104 | Colorectal cancer screening flexible sigmoidoscopy                                                      |

182  
183

184 1.5 Delivering the Intervention

185 A workflow for delivering the STOP intervention is provided in Figure 2.

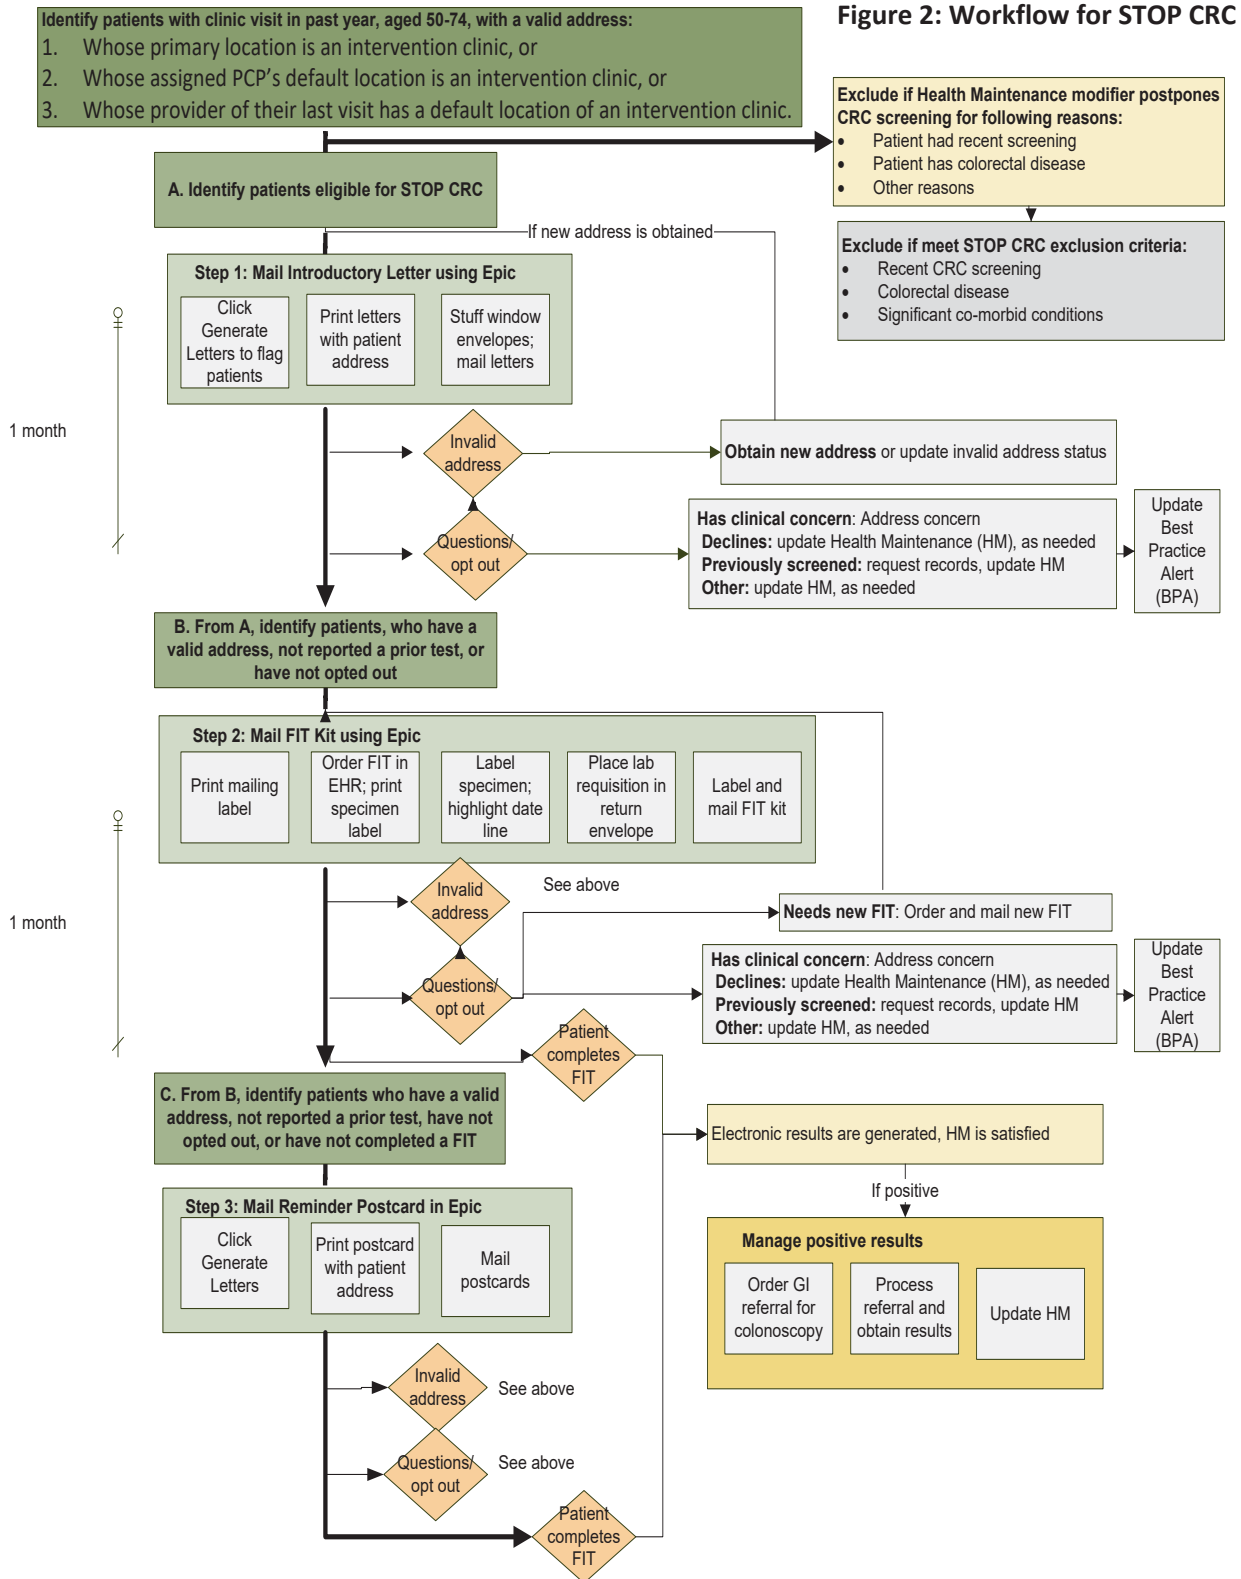

Figure 2: Workflow for STOP CRC

186  
187

188

189 **1.5.1 Randomizing Clinics and Selecting Clinic Launch Dates**

190 We will randomize clinics according to the randomization plan detailed in Section 2.2.

- 191 1. All clinics were able to start the intervention as early as February 2014. All clinics  
192 waited for the EPIC upgrade at the end of April, then started to work on testing the  
193 tools in May and June.
- 194 2. Usual care clinics will have access to the STOP CRC tools on a delayed roll-out beginning  
195 August 2015 (decision in Steering committee 2/12/15).

196 **1.5.2 Pre-launch period [3-months prior to launch]:**

- 197 a. We will conduct a clinic readiness assessment; we will interview key leadership  
198 at the clinics [medical director, operations director, QI lead, and EMR specialist]  
199 to learn about current CRC-related practices and clinic attributes. These  
200 interviews will be conducted in-person or over the phone.
- 201 b. We will train clinic staff in data validation activities and Best Practices to  
202 improve data quality. Data validation efforts will take place in both intervention  
203 and usual care sites. The training will address use of Health Maintenance (HM)  
204 to track patient use of preventive services, including CRC screening, and  
205 obtaining records from outside facilities.
- 206 i. Updating HM using existing clinic data: At the beginning of YR01 and  
207 YR02, OCHIN will provide clinics with a list of patients in their clinic  
208 organization who have evidence of recent CRC screening [colonoscopy  
209 in the past 9 years, sigmoidoscopy in the past 4 years, fecal testing in  
210 the past 11 months]. Clinic will be encouraged to update HM for these  
211 patients and obtain outside records, where needed;
- 212 ii. Updating HM using claims data: We will provide all clinics with  
213 Medicaid claims data for patients assigned to their clinic that have had  
214 a recent CRC screening. Clinics will be encouraged to update HM for  
215 these patients and obtain outside records, where needed.
- 216 iii. Use of HM will be compared across intervention and usual care sites, as  
217 part of on-going validation activities [see Section 2.8.]
- 218 c. We will review a readiness checklist that will proactively prepare clinics to  
219 address early issues that can arise during launch.
- 220 i. The readiness checklist will contain sections on 1) assuring lab  
221 interfaces are in place; 2) assessing needs for intervention materials; 3)  
222 establishing a site-specific training plan.
- 223 ii. The checklist will be reviewed with each clinic during a pre-launch  
224 phone call with the project director, Mr. Josue Aguirre, the EMR  
225 specialist from Virginia Garcia, and Cindy Stergar from Lean HealthCare  
226 West.
- 227
- 228 d. Clinics will be trained to use the tools.

- 229 i. Training will be led by Ms. Coury, using job aides and training materials
- 230 developed in Phase 1 (See Section 1.6).
- 231 ii. Training plans will be specific for each clinic; at a minimum a 4-hour
- 232 training session will be held at each intervention site; each clinic will
- 233 identify a contact person who will be responsible for training new staff
- 234 in the use of the tools and providing elbow support for addressing
- 235 questions as they arise.
- 236
- 237

### 1.6 Training Materials

238 Additional resources are available for implementation of the clinic workflow. **Clinic Implementation**  
 239 guides will be provided to each clinic, which will outline steps in executing the intervention.  
 240 Samples of clinic workflows used in the Phase I Clinic Implementation guide are available in the  
 241 Appendix: Section 4.1 (Workflow Diagrams from Virginia Garcia). Clinic guides describe using Epic to  
 242 support and document STOP CRC activities and mailing the patient materials:

- 243 ○ Mailing the STOP CRC Letters and Reminders
- 244 ○ Mailing the FIT Kit
- 245 ○ Reporting Workbench and EHR Documentation
- 246

### 1.7 Launch

248 During the launch, we will hold monthly phone calls with representative from each clinic sites. We  
 249 will also provide a clinic report showing current progress on CRC-related outcomes.

- 250 ● The project director will facilitate a monthly phone call with the project EMR-  
 251 specialist, Mr. Aguirre, Cindy Stergar of Lean HealthCare West, and EMR specialists  
 252 and QI leads from each group of participating clinics. These meetings will address:  
 253 1) issues that arise with implementation; and 2) additional training needs.
- 254 ● Clinic representatives will be emailed a clinic report monthly. An example of this  
 255 report is provided below (Figure 3). An additional report will compare the progress  
 256 of an individual site with the average for all participating sites.

257 **Figure 3: Sample STOP CRC Clinic Run Chart**

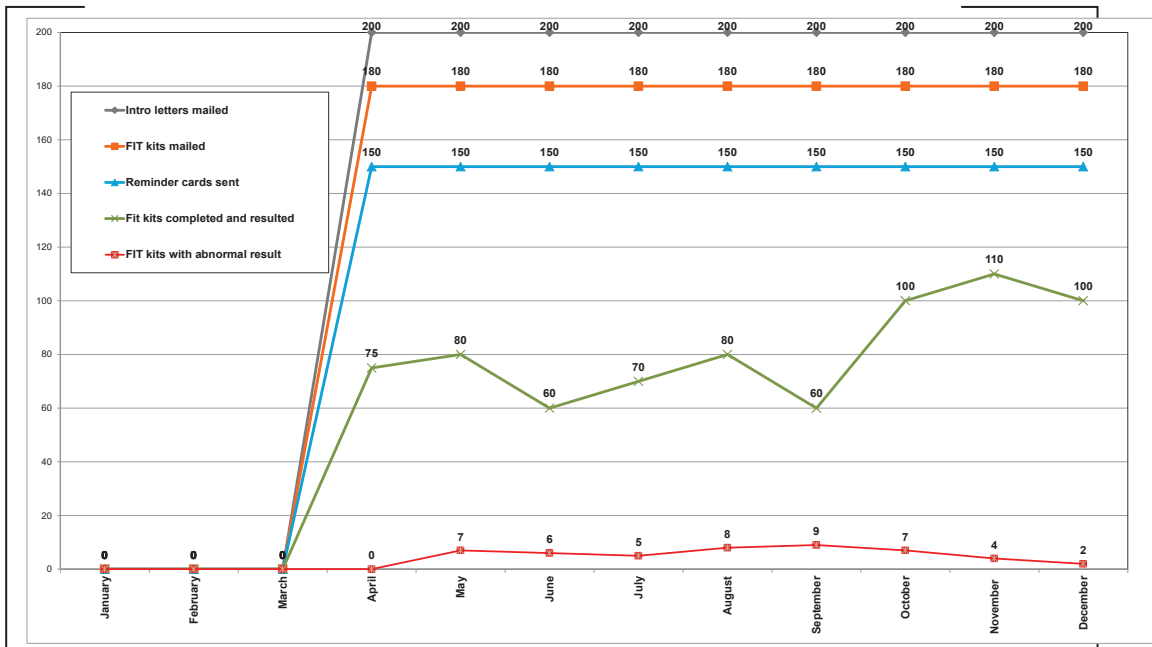

- 258
- 259
- 260
- 261
- 262
- 263
- 264
- 265
- 266
- 267
- 268
- 269
- 270
- 271
- 272
- 273
- 274
- 275
- 276
- 277
- 278
- 279
- 280
- 281
- 282
- 283
- 284
- 285
- 286
- 287
- 288
- 289
- 290
- 291
- 292
- 293
- 294
- 295
- 296
- 297
- 298
- 299
- The STOP CRC EHR tools will generate a real-time list of eligible patients in each intervention clinic, based on the clinic assignment, HM, and the STOP CRC eligibility criteria (See Section 1.12). Clinic staff will use the “Generate Letter” function in Reporting Workbench to print letters and document that they were printed. Clinics will prepare the mailing according to their preferred workflow. Clinic staff will affix postage and mail the Introductory Letter.
  - Two-weeks to 1 month following the mailing of the introductory letter, clinic staff will run the list of patients who are due for Step 2: the mailing of the FIT. This list includes patients who are presumed to have a valid address (Introductory letter was not returned by the Post Office). Clinics will follow their standard procedure for updating patient addresses in cases where letters are returned (e.g. update account status); FIT kits will be prepared and mailed using the following steps:
    - FTI Kit orders will be placed for each patient (currently must be done one-by-one, but with new release of Epic, batch ordering will become available)
    - Lab requisition is printed and stuffed in the biohazard bag that is returned with the collected sample; (some clinics may opt to highlight the date line on the kit to prompt patient to complete this)
    - Wordless instructions for completing the kit will be stuffed in the kit;
    - Mailing labels and postage will be affixed to the kit.
    - FIT kits that are returned by the Post Office will be tracked, and the clinic will follow its standard procedures for obtaining updated address information for its patients (e.g. update account status). Patients whose address is updated will be re-sent the Introductory letter.
  - Two weeks to 1 month following the mailing of the FIT kit, clinics will run a list of patients who are due for Step 3: the mailing of a Reminder Postcard. This list includes patients who are presumed to have a valid address (FIT kit not returned by the Post Office) and who have not returned their kit for processing. The procedure for mailing the Reminder Postcard is like that for the Introductory Letter: that is:
  - Clinic staff will use the “Generate Letter” function in Reporting Workbench to print Postcards and document that they were printed. They will prepare the mailing using the clinic’s preferred workflow. Clinic staff will affix postage and mail the Reminder Postcard.
  - Clinic staff will follow the procedures in the workflow document to track incoming phone calls; specifically:
    - Record incoming phone calls in Best Practice Alert, using Reason for call: STOP CRC;
    - Patients who have clinical concerns will be directed to the Patient Care Coordinator;
    - Patients who request a new kit will be mailed a new kit;
    - Patients who report previous CRC screening will be directed to the Patient Care Coordinator, who will update HM and request records, as needed.

300  
301  
302  
303  
304  
305  
306  
307  
308  
309  
310  
311  
312  
313  
314  
315  
316  
317  
318  
319  
320  
321  
322  
323  
324  
325  
326  
327  
328  
329  
330  
331  
332  
333  
334  
335  
336  
337  
338  
339  
340  
341

## **1.8 Improvement Cycles**

In partnership with health center leadership teams and in consultation with Lean HealthCare West, we will conduct Improvement Cycles in all intervention clinics. Clinics will be assessed for their quality improvement resources and ability to perform an improvement cycle independently. Depending on the results assessment, the study will proceed one of two ways:

- Clinics whose staff are trained in conducting improvement cycles will be asked to do so independently. They will submit a report of their findings 6-months following the launch of the STOP CRC program at their site.
- Clinics that need additional assistance will be provided training and on-site support by consultants at Lean HealthCare West. This support will include on-line training modules and in-person training sessions that are customized to the structure of clinic teams.

The study team will collect all Improvement Cycle reports from clinic sites, 6 months after the launch of the STOP CRC program at a given site. Lean HealthCare West has experience working with most of our participating clinics.

Beginning three months before the end of YR01, clinic leaders will be asked to present the results of their Improvement Process during an on-going meeting of the STOP CRC advisory board. During the presentation, they will be provided with feedback from the Advisory Board. In some cases, the Improvement Process results will suggest an improvement that is internal to the clinic [strategies that improve efficiency of intervention delivery]; in other cases, clinics may be ready to expand the intervention to incorporate additional components [e.g. telephone reminders, etc.].

## **1.9 Maintenance**

The second year of the intervention will be considered a maintenance year. Maintenance will comprise the following activities:

- Health Center leaders will choose whether to maintain the program in YR02 at the intervention sites;
- Those that maintain will document any adaptations that they make to the program, and we will capture this during the qualitative Rapid Assessment Process (See Section 2.8)
- Health Center leaders will also choose whether to roll-out the program in YR02 to usual care clinics within their health center.
- Health Center leaders may also opt to roll-out the program in YR02 to additional clinics in their health center that did not participate in the study (neither intervention or usual care).

The research team will document maintenance at the clinic- and patient-levels. Clinic-level maintenance will assess the number of clinics that maintained the program in Year 02, overall and by intervention status (including clinics that were neither assigned to intervention or usual care). Patient-level maintenance will assess the proportion of patients who completed fecal testing in both years of the program.



342

## 343 **1.10 Advisory Board**

344 The STOP project is guided by an advisory board of clinician, EMR experts, community organizations  
345 concerned with CRC and CRC screening, and patient advocates. Below is a list of advisory board members.  
346 The advisory board meets quarterly. The Advisory Board serves an important role on this project. We have  
347 relied on the Advisory Board to provide guidance and feedback on various activities of the project. The  
348 Advisory Board was asked to review project procedures, regularly review Phase 1 goals and milestones to  
349 ascertain progress and provide input on the design of the Auto Plus intervention. They also reviewed data  
350 from the pilot project and helped us select a high-impact, sustainable, and feasible program that could  
351 realistically be adopted by clinics. Finally, they reviewed criteria for inclusion and advised on clinics for the  
352 trial and the evaluation plan for pragmatic trial. We anticipate that this Advisory Board will also actively  
353 participate in Phase 2. The following are member of the Advisory Board:

- 354 • Marie Dahlstrom, MA, Executive Director, Familias en Acción (Latino Patient Navigator Organization)
- 355 • Olga Gerberg, Patient Navigator, Familias en Acción
- 356 • Janet Hamilton, MS, Executive Director, Project Access Now
- 357 • Elizabeth Steiner, MD, State Legislator, Oregon
- 358 • Mitch Greenlick, PhD, State Legislator, Oregon
- 359 • John Muench, MD, Director of Behavioral Medicine OHSU Richmond Clinic  
360 Co-Chair of OCHIN Center Operations Group
- 361 • Zoe O'Neill, MPA, Oregon Primary Care Association
- 362 • Joe Carroll, MD, Family Physician, Open Door CHC (FQHC)
- 363 • Steve Engle, MD, Mad River Community Hospital
- 364 • Meena Mital, MD, Medical Director (Interim), Multnomah County Health Department (FQHC)
- 365 • Ann Turner, MD, Co-Medical Director of Virginia Garcia Memorial HC (FQHC)
- 366 • Charles Gallia, Analysis & Research, Manager Division of Medical Assistance Programs
- 367 • Ricardo Jimenez, MD, Medical Director, Sea Mar
- 368 • Sara Barker, MPH, Health Home Director and Chronic Care Program Director, Sea Mar
- 369 • Jim Allison, MD, Gastroenterologist, Adjunct Investigator Kaiser Permanente Northern California  
370 Division of Research
- 371 • John Inadome, MD, Gastroenterologist, Cyrus E. Rubin Professor and Head, Division of  
372 Gastroenterology, University of Washington School of Medicine
- 373 • Ginger Scott, RN, BSN, Director of Nursing, CHC Medford
- 374 • Rob Unitan, MD, Director of Optimization and Innovation; Northwest Permanente, PC

375

376 During Phase 2, the Advisory Board will address the following topics:

- 377 • Guide the pre-launch and launch activities
- 378 • Review the status of all intervention sites, and suggest mid-course corrections
- 379 • Review results of data validation
- 380 • Review results from Improvement Cycles
- 381 • Serve as advocates for the project
- 382 • Review outcome data (both quantitative and qualitative), and assess strategies to improve  
383 Effectiveness, Reach, Implementation
- 384 • Provide guidance and strategies for program maintenance

385

386 **1.11 Participating clinics**

387 STOP CRC will work with several OCHIN-affiliated clinics in Oregon and California. In later years, we will  
 388 adapt and pilot-test the program at Sea Mar Community Health Centers. Below is a list of participating  
 389 clinics organizations, and the number of eligible and participating sites.

390

| Clinic Organization | Number of clinic sites with 450+ active patients | Number of participating clinics |
|---------------------|--------------------------------------------------|---------------------------------|
| Health Center 1     | 2                                                | 2                               |
| Health Center 2     | 3                                                | 3                               |
| Health Center 3     | 3                                                | 3                               |
| Health Center 4     | 4                                                | 4                               |
| Health Center 5     | 6                                                | 6                               |
| Health Center 6     | 2                                                | 2                               |
| Health Center 7     | 6                                                | 4                               |
| Health Center 8     | 4                                                | 2                               |

391

392 **1.11.1 Clinic eligibility criteria**

393 We selected these clinics by working with our advisory board to establish criteria for clinic participation.

394 Below is a list of these criteria. These criteria are listed below.

395

| Clinic Criteria                        | Description                                                                                                                                               |
|----------------------------------------|-----------------------------------------------------------------------------------------------------------------------------------------------------------|
| Clinic site size                       | A clinic site must have 450+ patients aged 50 - 74                                                                                                        |
| Number of clinic sites in organization | Clinic organization must have at least 2 sites that meet size requirement.                                                                                |
| FOBT/FIT                               | Clinic organization must use the same screening method in its intervention and usual care clinics.                                                        |
| Colonoscopy capacity                   | Clinic must have sufficient capacity to perform colonoscopies for patients who screen positive on FOBT/FIT.                                               |
| Lab interface/ capacity                | Clinic sites must have direct electronic interface with lab that processes FOBT/FITs; lab must have sufficient capacity to process additional tests.      |
| Randomization                          | Clinics must agree to randomize their clinics; each organization will be assigned at least one intervention and one usual care site.                      |
| Testing the uninsured                  | Clinic organization must have a plan for screening for uninsured patients.                                                                                |
| Research requirements                  | Clinic organizations must consent to leadership requirements (clinic interviews, data validation, advisory board involvement, interpretation of findings) |
| Prioritization/ willingness            | Clinic leadership must prioritize project and set improvement targets.                                                                                    |
| Human Subjects requirements            | Clinic organization must agree to cede to KP NW IRB.                                                                                                      |
| Federal Wide Assurance                 | Clinic organizations must maintain active FWAs                                                                                                            |

396

397 **1.11.2 Clinic Recruitment Procedures**

398 OCHIN and CHR staff reviewed lists of possible health centers and determined which were eligible. Health Center  
 399 representatives were sent an email from OCHIN introducing the project and obtaining permission to provide  
 400 contact information to CHR investigators. All health centers agreed. Health Center representatives were then  
 401 contacted by Sally Retecki, Community Research Liaison, who organized in-person or WebEx meeting with  
 402 leadership teams. These meetings lasted 1.5 hours. Ms. Retecki provided the following clinic recruitment  
 403 materials to attendees during these meetings:

- 404 • Introduction to STOP CRC (document and PowerPoint)
- 405 • Scope of work
- 406 • Budget templates
- 407 • Draft letter of support
- 408 • Sample staffing plan

409 Health Center representatives were asked to respond with their interest in participating in the STOP CRC project  
 410 by September 1, 2013.

411 **1.12 Selection of Eligible Patients**

413 The main eligibility criteria for STOP CRC are screening criteria as adopted by the National Quality Forum (NQF).  
 414 Patients must be 50-74 years old, an active patient identified by a prior visit, without screening or conditions that  
 415 would make them poor candidates for screening. Below is a list of the inclusion and exclusion criteria for the  
 416 project.  
 417

| Inclusion and Exclusion Criteria for STOP CRC Patient Participants | Time           | Temporary/Permanent** |
|--------------------------------------------------------------------|----------------|-----------------------|
| <b>Inclusions</b>                                                  |                |                       |
| Aged 50-74                                                         | Current        | Temporary             |
| Have at least 1 visit in past 12 months                            | Past 12 months | Temporary             |
| Have viable address                                                | Current        | Temporary             |
| <b>Exclusions – CRC screening history</b>                          |                |                       |
| Colonoscopy Complete                                               | Past 9 years   | Temporary             |
| Colonoscopy Referral                                               | Past 1 year    | Temporary             |
| Gastroenterology Referral                                          | Past 1 year    | Temporary             |
| FIT (or FOBT) Orders                                               | Past 11 months | Temporary             |
| Flex sigmoidoscopy Referral                                        | Past 1 year    | Temporary             |
| Flex sigmoidoscopy Complete                                        | Past 4 years   | Temporary             |
| <b>Exclusions – Colorectal disease</b>                             |                |                       |
| Prior dx of colorectal cancer                                      | Ever           | Permanent             |
| Prior dx of total colectomy                                        | Ever           | Permanent             |
| Ulcerative colitis and Inflammatory Colitis                        | Ever           | Permanent             |

|                                           |             |           |
|-------------------------------------------|-------------|-----------|
| History of high risk polyps –             | Ever        | Permanent |
| <b>Exclusions: co-morbid conditions</b>   |             |           |
| History of renal failure/ESRD             | Ever        | Permanent |
| Living in nursing home or assisted living | Past 1 year | Temporary |
| Hospice Program                           | Ever        | Permanent |

418 \*Additional local codes should be included in procedures list if available.

419 \*\*Temporary means that status can change during observation period.

420  
421 The tables below list the codes that were used to identify colonoscopy orders, results and GI referrals,  
422 FIT/FOBT orders, flexible sigmoidoscopy referrals and completions, colorectal disease, and co-morbid  
423 conditions.  
424

| <b>Codes to Identify Colonoscopy Orders or Results and GI Referral</b> |                                                         |                                                                                              |
|------------------------------------------------------------------------|---------------------------------------------------------|----------------------------------------------------------------------------------------------|
| Description                                                            | ICD9*/CPT Codes                                         | HCPCS**                                                                                      |
| Colonoscopy Orders/Referral/Results                                    | 44388-44394, 44397, 45355,<br>45378-45387, 45391, 45392 | G0105, G0121                                                                                 |
| Virtual Colonoscopy Referral                                           | 0066T, 0067T 74261-74263                                |                                                                                              |
| GI Referral                                                            |                                                         | Referral Code indicating GI or colonoscopy referral or 9110 or 9140 for colonoscopy referral |

425 \*International Classification of Disease, Version 9

426 \*\* Healthcare Common Procedure Coding System

427

| <b>Codes to Identify FIT/FOBT orders</b> |                 |                     |
|------------------------------------------|-----------------|---------------------|
| Description                              | ICD9*/CPT Codes | HCPCS**             |
| FIT/FOBT orders                          | 82270, 82274    | G0107, G0328, G0394 |

428 \*International Classification of Disease, Version 9

429 \*\* Healthcare Common Procedure Coding System

430

| <b>Codes to Identify Flexible Sigmoidoscopy Referral and Completion</b> |                                                                                                 |         |
|-------------------------------------------------------------------------|-------------------------------------------------------------------------------------------------|---------|
| Description                                                             | ICD9*/CPT Codes                                                                                 | HCPCS** |
| Flex sigmoidoscopy Referral                                             | 45330, 45331, 45332, 45333, 45334,<br>43335, 45337, 45338, 45339, 45340,<br>45341, 45342, 45345 | G0104   |
| Flex sigmoidoscopy completion                                           |                                                                                                 |         |

431 \*International Classification of Disease, Version 9

432 \*\* Healthcare Common Procedure Coding System

433

| <b>Codes to Identify Colorectal Disease</b> |
|---------------------------------------------|
|---------------------------------------------|

| Description                                | ICD9*/CPT Codes                       | HCPCS** |
|--------------------------------------------|---------------------------------------|---------|
| Prior dx of colorectal cancer              | 153, 154.0, 154.1, 197.5              | V10.0   |
| Prior dx of total colectomy                | 44150-44153, 44155-44158, 44210-44212 |         |
| Ulcerative colitis or inflammatory colitis | 555, 556                              |         |
| History of high risk polyps                | 211.3, 199.1                          |         |

434  
435  
436

\*International Classification of Disease, Version 9  
\*\* Healthcare Common Procedure Coding System

| Codes to Identify Co-morbid Conditions   |                      |                          |
|------------------------------------------|----------------------|--------------------------|
| Description                              | ICD9*                | HCPCS**                  |
| History of renal failure / ESRD          | 585.5, 585.6 and 586 | Referral to dialysis     |
| Living in nursing home / assisted living |                      | Referral to nursing home |
| Under hospice care                       |                      | Referral to hospice      |

437  
438  
439  
440

\*International Classification of Disease, Version 9  
\*\* Healthcare Common Procedure Coding System

### 1.13 Enrollment Procedures and Participant Identification

441 OCHIN programmers will develop an algorithm for using the EHR to automatically identify eligible patients,  
442 which will be updated regularly, so that the new data such as FOBT completion can be applied to those patients  
443 who are eligible to receive the automated intervention at each clinic. The electronic tools will automatically  
444 provide a list of eligible patients in the Reporting Workbench tool in EPIC. Clinics will review the patient list prior  
445 to mailing the introductory letter to assess whether the patient is appropriate for screening.  
446

### 1.14 Intervention Delivery and Core Components

448 The intervention components are a mailed fecal test and an improvement cycle (e.g., a PDSA cycle). Each  
449 potential participant will be sent an introductory letter introducing the study, asking them to call if they  
450 have prior screening or clinical concerns. The letter will contain a toll-free telephone number that the  
451 participant can use to call the clinic if he or she does not want any further contact from the study. A patient  
452 can also choose another type of screening method, such as colonoscopy. Depending on the clinic's  
453 preference, the mailings may take place every month based on the birthday month of the patient, or less  
454 frequently depending on the clinic flow.  
455

- 456 • Clinic staff will log whether a patient declines to participate in the study and declination rates will  
457 be monitored by the study team.
- 458 • One month after the mailing of the introductory letter, those patients not reporting being current  
459 for screening, who have a viable address and have not called to opt out of the program (because of  
460 prior screening or other reasons) will be mailed a FIT kit;
- 461 • One month after the mailing of the FIT kit, those not reported as completing the kit will be mailed a  
462 reminder postcard.

463 • Four to 6 months after the mailing of the FIT kit, an improvement cycle will be facilitated with the  
 464 clinic; this will identify strategies to further enhance the reach or effectiveness of the program.

465 Phase 1 of the study developed the participant intervention materials, which consist of the following (see  
 466 Appendix D for samples):

- 467 • STOP CRC introductory letter (in English and Spanish)
- 468 • STOP CRC wordless FIT kit instruction
- 469 • STOP CRC reminder postcard

471 **2 Statistical Analysis Plan**

472 **2.1 Study Design**

473 STOP CRC is a two-arm cluster randomized design with clinic as the unit of randomization and analysis. The  
 474 analysis plan is based on an adapted consort diagram, see **Figure 4:**

**Figure 4: Adapted Consort Diagram**

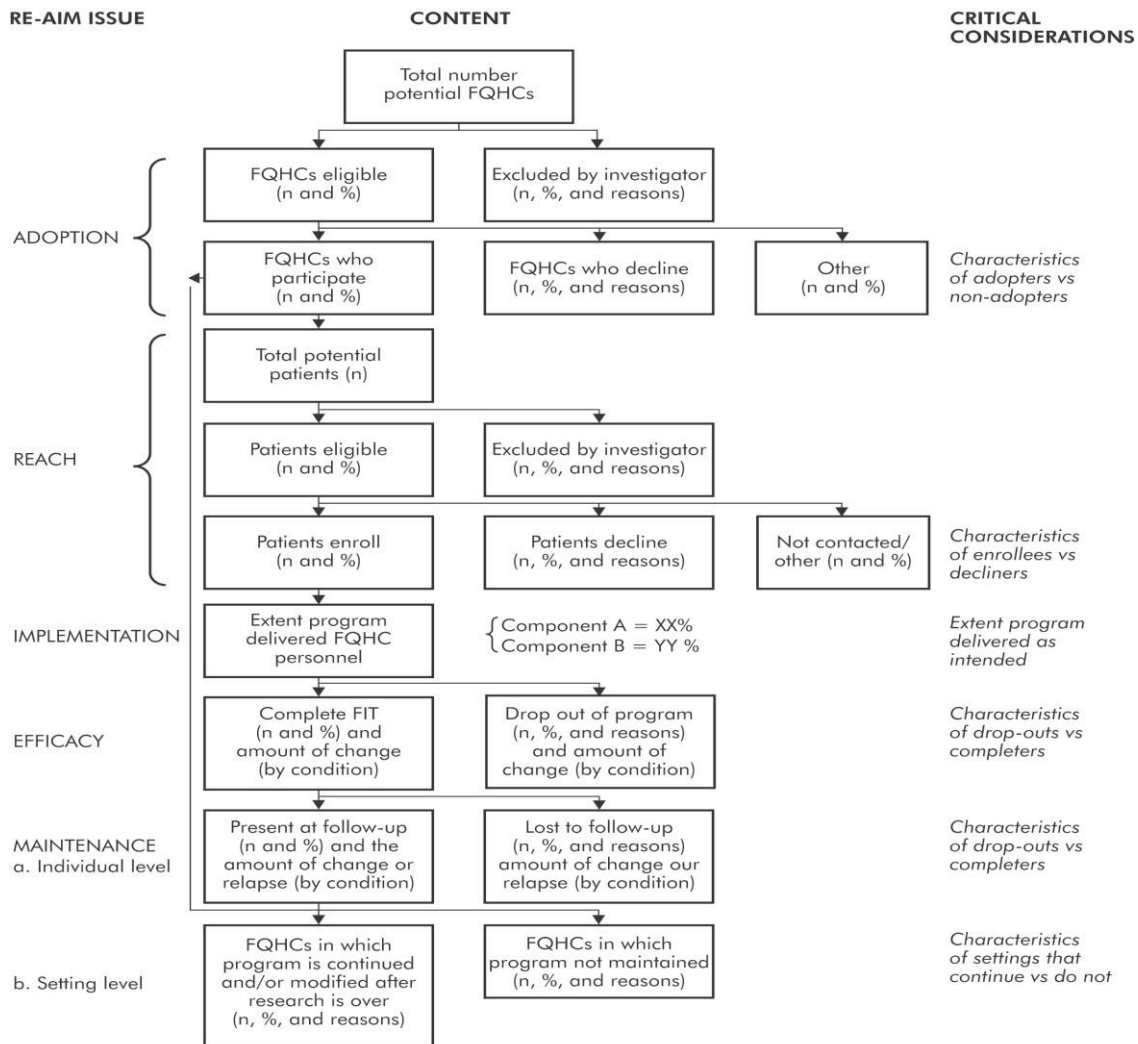

\*adapted from extended CONSORT diagram (Kessler 2011)

475

476 **2.2. Randomization**

477 Based on simulation work conducted by the Collaboratory's Biostatistics Core, we abandoned our original  
478 plans to conduct a constrained randomization and instead opted for a simple stratified randomization  
479 based on Health Center. Within each of these administrative units, the randomization was blocked to  
480 assure maximum possible balance of intervention and control clinics. Having created the basic  
481 randomization scheme with two groups (A and B), the assignment of the groups to intervention and control  
482 conditions was performed randomly on a conference call with all health center representatives on February  
483 4<sup>th</sup>, 2014 to assure maximum transparency of the process to our participating sites. The randomization  
484 process relied on an electronic dice that was rolled by a member of the advisory board.

486 **2.3 Study Outcomes**

487 The original UH3 protocol stated that the study population would be accrued over the 12 months following  
488 randomization (February 4, 2014–February 3, 2015) and then be followed for 12 months after that to assess  
489 the study outcome. However due to the decision to roll out the intervention to control clinics in August of  
490 2015, we truncated the follow up window for all individuals, intervention and control, as of this date. In  
491 addition, delays in intervention startup required us to reformulate some of our secondary outcomes. The  
492 revised is a statement of our current primary and secondary outcomes.

493 **2.3.1 Primary Outcome Variable**

494 Our primary outcome is the completion of fecal testing within the earlier of (a) 12 months from study  
495 accrual or (b) August 3, 2015 (when study tools were made available to usual care clinics). As our primary  
496 interest was on clinic level return rates, however, these individual responses were weighted by 1/(clinic  
497 size) so that each clinic's data was weighted equally (see section 2.4.1).

498  
499 To assure maximum comparability of the intervention and control samples, all participants were accrued in  
500 the same manner. For control clinics we thus looked for the first date that a participant would have been  
501 eligible to receive the intervention had it been turned on for that site. It follows that both the distribution  
502 of accrual times as well as the distribution of follow up times should be comparable for participants in the  
503 two groups.

505 **2.3.2 Secondary Outcomes**

506 Our secondary outcomes are provided below:

- 507 • For participants who received a FIT kit, the probability of returning it within 3, 6, 9 and 12  
508 months of its being sent as well as time to FIT/FOBT return
- 509 • Receipt of any CRC screening (fecal test, sigmoidoscopy or colonoscopy) during the follow-  
510 up window
- 511 • NQF score (proportion of those age 50-74 with a colonoscopy within 10 years, flexible  
512 sigmoidoscopy within 5 years, and FOBT/FIT within 1 year) as assessed relative to the one-  
513 year pre and each of the first two years post randomization
- 514 • Presence of a positive FIT/FOBT among those who return a FIT kit
- 515 • Referral for a colonoscopy among those with a positive FIT/FOBT
- 516 • Completion of a colonoscopy following a positive FIT/FOBT

518 **2.3.3. Process Outcomes**

519 Though not secondary outcomes per se, we will also record a number of process measures that describe  
520 the Reach, Adoption, and Implementation of the intervention among intervention clinics. These are

521 summarized below:

- 522 • Adoption: N clinics that participate/ N anticipated [characteristics of adopters]
- 523 • Reach: N participants who receive intervention components / N anticipated. We will record  
524 N invalid address, N decline, and N who report prior screening. We will also assess patient  
525 phenotype characteristics related to reach (e.g. such as race, language and invalid address)
- 526 • Implementation: N activities delivered by clinics / N anticipated.
- 527 • Maintenance: N clinics that implement STOP CRC in YR 02/ N implemented in YR 01. For  
528 those clinics who do adopt/maintain the intervention in year 2, we will describe similar  
529 intervention outcomes for year 2 (e.g., percent with FIT/FOBT returned within 12 months)  
530 and the proportion of eligible patients current for FOBT and any CRC screening for both  
531 years of the study.
- 532 • In addition to the measures above, we will gather qualitative data to assess the adoption  
533 and fidelity of implementation of the program in the clinics; including clinic-level barriers to  
534 ongoing maintenance and patient-level factors that influence program effectiveness.
- 535 • As this is a stepwise intervention, the reach and implementation for each component will  
536 be based on the number eligible for that step.
- 537 • The following variables will be captured in Reporting Workbench:
  - 538 ○ Intro letter mailed, date
  - 539 ○ Income phone call, date
  - 540 ○ Declined participation, date
  - 541 ○ Reported previous CRC screening, ineligible, date
  - 542 ○ Invalid address, date
  - 543 ○ FIT kit mailed, date
  - 544 ○ Requested new kit, date
  - 545 ○ Postcard mailed, date

546 Samples of project reports are available in Section 4: Research Reports.

547

#### 548 **2.3.4. Assessment of adoption**

549 From the original list of 41 Health Centers in Washington, Oregon and Northern California, 13 Health  
550 Centers had a single clinic or did not meet the size requirements of having at least 2 clinics with 450  
551 patients aged 50-74, and 17 were outside of the geographic catchment area. The remaining 11 Health  
552 Centers were eligible and 3 declined participation. Among the recruited clinics, 24 were FQHCs with shared  
553 governance (a centralized leadership team, etc.) and 2 clinics were affiliated with an academic medical  
554 center (and operated independently of each other). To assess adoption, we will:

- 555 • Compare and report clinic characteristics of adopters and non-adopter; these include clinic  
556 size, location, % Hispanic, % uninsured, and baseline CRC screening rates, among others.
- 557 • For our assessment of maintenance, we will also track and report clinics that decline  
558 participation in YR02.

559

560

**Figure 5**, below, shows the CONSORT diagram of clinic recruitment.



**Figure 5: Clinic-level CONSORT diagram for STOP CRC**

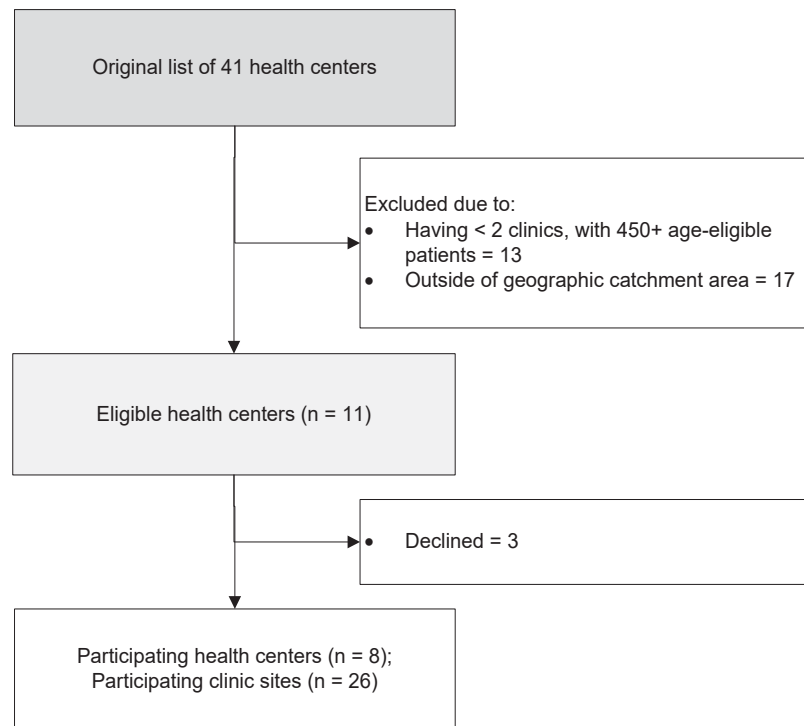

561

562

### 563 2.3.5. Moderator Variables

564 Moderators include demographic characteristics, health status, and health care utilization variables. The  
565 following variables will be assessed as moderators of the intervention.

- 566
- Demographic characteristics will be assessed using the following variables:
    - 567 ○ Age, on date of first mailing [50-64, 65-75]
    - 568 ○ Gender [Female, Male]
    - 569 ○ Race, self-reported [Black, Asian, White, Native American, Unknown]
    - 570 ○ Ethnicity [Hispanic, non-Hispanic]
    - 571 ○ Language, primary self-declared [English, Spanish, other]
    - 572 ○ Tobacco use, at last visit [Current, Passive, Never, Unknown]
    - 573 ○ Socio-economic status [<100% FPL, 100-150 FPL, 151-200 FPL, 200+ FPL]
    - 574 ○ Insurance status [Uninsured, Medicaid, Medicare, Private, Other]
    - 575 ○ Community- and neighborhood-level variables obtained from linking EHR to Census
    - 576 and American Community Survey data.
  - Health care utilization will be assessed using ACG or Charlson Risk Scores if possible, or the  
577 following variables:
    - 578 ○ History of FIT/FOBT, among aged 52-74 prior to exclusion period [Yes, No]
    - 579 ○ History of FIT/FOBT, among aged 52-74 prior to exclusion period [Yes, No]

- 580 ○ History of Pap screening, among women aged 50-64, in past 3 years [Yes, No]
- 581 ○ History of mammography screening, among women aged 50-74, in past 2 years
- 582 [Yes, No]
- 583 ○ Flu shot in past year, both genders, all aged 50-74 [Yes, No]
- 584 ○ Number of office visits in past year [continuous N]
- 585 ○ Number of office visits during intervention year [continuous N]
- 586 ● We will consider as moderators -- health status and co-morbid conditions -- using the
- 587 following variables:
- 588 ○ Congestive heart failure (CHF), ever
- 589 ○ Peripheral vascular disease (PVD), ever
- 590 ○ Cerebral vascular disease/ dementia, ever
- 591 ○ Chronic obstructive pulmonary disease, ever
- 592 ○ Diabetes mellitus (exclude gestational diabetes), ever
- 593 ○ Metastatic solid tumor, ever
- 594 ○ Hypertension diagnosis, ever
- 595 ○ Depression diagnosis, ever
- 596 ○ Currently using Warfarin
- 597 ○ John Hopkins Adjusted Clinical Group (ACG) case-mix system comorbidity score

598

## 599 **2.4 Analysis**

600 The original analytic plan called for aggregating each clinic's data into 8 separate return rates (one each for  
 601 subgroup defined by age (50-64 vs. 65+), gender and race (minority vs. non-minority). The resulting  
 602 analytic dataset would thus consist of 208 observations (26 clinics X 8 observations per clinic). Treating the  
 603 resulting proportions as approximately normally distributed, we planned to use mixed model ANCOVA to  
 604 estimate the screening probabilities as a function of intervention, age, gender, race, and baseline clinic  
 605 screening rate, with clinic specified as a cluster variable.

606

607 Once the analytic cohort was accrued, we discovered that some of the clinic subgroups were extremely  
 608 small, which in turned threatened the validity of the planned analysis. In consultation with the NIH  
 609 Collaboratory's Biostatistics Core, we therefore shifted to a patient level analysis. In order to maintain the  
 610 initial focus on clinic-level differences, we weighted each individual by 1/(clinic size). This shift in analytic  
 611 plan therefore maintained the spirit of the original analysis while providing a better fit to the nature of the  
 612 data (i.e., a logistic model reflecting the binary nature of individual observations). An added bonus of this  
 613 revised analytic framework is that it allowed for a finer adjustment for patient-level factors as part of  
 614 secondary analyses.

615

616 In addition to the above change, we also added some sensitivity analyses to try to account for the startup  
 617 delays that were experienced. Finally, we decided to adjust for Health Center in place of other clinic-level  
 618 covariates since preliminary analyses indicated that this substantially reduced the intraclass correlation  
 619 coefficient compared to other adjustment options.

620

#### 621 **2.4.1 Primary and Secondary Outcome Analysis**

622 The data can be viewed as coming from a 2-level hierarchical model with patients clustered within clinics,  
623 and our primary interest is focused on clinic-level effects (to what extent did the intervention increase  
624 clinic-level FIT/FOBT completion rates).

625

##### 626 Primary Analysis

627 To assess our primary outcome, we fit generalized estimating equations (GEE) models with a logistic link to  
628 model patient-level data. Patients are weighted by  $1/(\text{clinic size})$ , so that each clinic's data will have an  
629 equal weight. The primary analytic model adjusted for age, gender and health center, used robust variance  
630 estimators, and specified clinic as a clustering variable to account for intra-clinic correlation. (The intra-  
631 class correlation coefficient for this adjusted model was 0.05.) We report the intervention effect as the  
632 absolute difference between intervention and usual care clinics in adjusted probabilities calculated using  
633 mean values for all covariates in the model since we felt this was the more relevant metric from a public  
634 health perspective. However, we report (two-sided) p-values based on the  $\ln(\text{odds ratio})$ . A p-value  $< 0.05$   
635 is considered statistically significant.

636

##### 637 Secondary Analyses

638 We used the same analytic approach for the secondary outcome of any CRC screening. For both FIT  
639 completion and any CRC screening, additional models were fit using interaction terms to test the extent to  
640 which the intervention effect differed across Health Centers. The interactions were treated as fixed effects  
641 in these models.

642

643 The analysis of our other secondary outcomes will be more descriptive in nature. Regarding the proportion  
644 of returned FOBT/FIT kits that turn out positive, while we anticipate a sizeable number of returned  
645 FOBT/FIT kits for each of the intervention clinic (typically in excess of 150), the numbers will be much  
646 smaller for control clinics (for many of the smaller clinics less than 20) and hence much less precisely  
647 measured. The situation is only compounded for the secondary outcomes of referral for a positive FIT and  
648 completion of a colonoscopy following referral, since they are further limited to FOBT/FIT kits that are  
649 returned and are positive. Hence, for all these outcomes, the focus will be more on the experience of the  
650 intervention clinics than formal comparisons between intervention and control clinics, though we will look  
651 at this latter question to the extent we are able. Ultimately, we wish to know the extent to which the  
652 clinics are able to maintain the program and the impact it may have on their operations, and hope that this  
653 information will help to shed light on this issue.

654

655 For the NQF scores, the data can be interpreted as coming from a step wedge design. In the year prior to  
656 randomization all clinics were following usual care. In the first-year post randomization the intervention  
657 clinics were using the intervention and the control clinics still usual care. In the second-year post  
658 intervention all clinics were using the intervention. In each case we have a single observation per clinic.  
659 We will use a random effects model to assess intervention effects while adjusting for within clinic  
660 clustering. The model will allow for period effects and will also estimate separate effects for the first and  
661 second year of intervention rollout.

662

##### 663 Sensitivity Analyses

664 Sensitivity analysis will include GEE models without weighting, GEE models that also adjust for insurance  
665 status, random effects models, and models excluding the two clinics (one intervention and one control)

666 affiliated with an academic medical center (these clinics did not have shared governance and did not use  
667 the same FIT kit throughout the intervention).  
668

669 Finally, while our primary analysis will include all individuals accrued after EHR tools were provided to  
670 clinics on February 4, 2014, no clinic began printing letters until at least June of 2014; some did not begin  
671 until spring of 2015. To account for this implementation delay, we will repeat the above analyses for FIT  
672 completion and “any CRC screening” using a lagged dataset that only included individuals accrued between  
673 June 4, 2014 and February 3, 2015. As with the primary dataset, outcomes for this lagged dataset will be  
674 assessed through August 3, 2015, after which materials were made available to usual care clinics.  
675

#### 676 **2.4.2 Analysis of Process Data**

677 We will use proportions of clinics or patients to calculate adoption, reach, implementation and  
678 maintenance. Consistent with our adapted CONSORT, to the extent possible, we will report descriptive  
679 characteristics of adopters vs. non-adopters and maintainers vs. non-maintainers (at the clinic level) and  
680 completers vs. non-completers in YRS 01-02 (at the patient level).  
681

#### 682 **2.4.3 Moderator analysis**

683 In addition to the previously mentioned analysis looking at whether the intervention effect varied by  
684 service area network, we plan to conduct a detailed moderator analysis looking at the extent to which the  
685 intervention effects persisted within, and potentially differ across, subgroups defined by a variety of patient  
686 level factors. Since the focus of these analysis is on patient level effects, we will use random effects, rather  
687 than GEE models, for these analyses.  
688

#### 689 **2.5. Power and Sample Size**

690 For Phase 2, STOP effectiveness will be assessed using a two-arm, cluster randomized design with a total of  
691 26 clinics. Our power calculations are based on the following assumptions:  
692

- 693 • We have equal Ns per clinic and equal numbers of clinics per group. In practice, the sample sizes  
694 will not be equal, but since almost all clinics had at least 450 subjects who qualified for the  
695 intervention (most had at least 700 qualifying individuals), we conservatively use this figure for all  
696 sites.  
697
- 698 • We compare two binomial proportions with a type I error rate of 5%. For each of a variety of  
699 design assumptions, we determined the design effect due to clustering and used this to calculate  
700 the effective sample size as if these were independent observations. We then used the formulas  
701 from Hulley et al., to estimate power.  
702
- 703 • Finally, we assume an intention-to-treat approach in which we consider a treatment failure to be  
704 any individual who receives the initial intervention mailing (or for the UC clinics would have  
705 qualified to receive the mailing) and does not have a completed fecal test within their follow-up  
706 window. Although we expect to learn through the intervention process that many intervention  
707 participants do not require screening, we have no way to exclude comparable individuals from the  
708 control clinics and hence must ignore this information for the primary analysis.  
709

710 We calculated power for Intra-class Correlation Coefficients (ICCs) of .03, .04, and .05, usual care FIT return  
711 probabilities of 5%, 10%, and 15%, and intervention effects (absolute differences) of 10 – 14 percentage

712 points. Based on analyses done by Dr. Green (STOP co-PI), we expected the ICC to be about .03, though as  
 713 it turned out the ICC was closer to .05. Using this latter figure, we had >90% power for detecting effect  
 714 sizes of at least 13 percentage points even with UC probabilities as high as 15%. Power was > 88% for  
 715 detecting effect sizes of at least 11 percentage points if the UC probabilities were no higher than 10%.  
 716 Power declines only slightly even for subgroups 1/6<sup>th</sup> of the full cohort (e.g., for 17% Hispanic patients).  
 717 This reflects the fact that we have an overabundance of individuals within each clinic and that the main  
 718 driver of power is thus the number of clinics.

719  
 720 **Estimated Power with 26 clinics**  
 721

|                   |            | <b>Difference in probability between intervention and UC</b> |            |            |            |            |
|-------------------|------------|--------------------------------------------------------------|------------|------------|------------|------------|
|                   |            | <b>.10</b>                                                   | <b>.11</b> | <b>.12</b> | <b>.13</b> | <b>.14</b> |
| <b>ICC=.03</b>    |            |                                                              |            |            |            |            |
|                   | <b>.05</b> | 99.2%                                                        | 99.7%      | 99.9%      | 99.9%      | 100.0%     |
| <b>Prob in UC</b> | <b>.10</b> | 96.2%                                                        | 98.1%      | 99.1%      | 99.6%      | 99.8%      |
|                   | <b>.15</b> | 91.7%                                                        | 95.4%      | 97.6%      | 98.8%      | 99.4%      |

722  
 723

|                   |            | <b>Difference in probability between intervention and UC</b> |            |            |            |            |
|-------------------|------------|--------------------------------------------------------------|------------|------------|------------|------------|
|                   |            | <b>.10</b>                                                   | <b>.11</b> | <b>.12</b> | <b>.13</b> | <b>.14</b> |
| <b>ICC=.04</b>    |            |                                                              |            |            |            |            |
|                   | <b>.05</b> | 97.1%                                                        | 98.5%      | 99.3%      | 99.7%      | 99.8%      |
| <b>Prob in UC</b> | <b>.10</b> | 90.2%                                                        | 94.2%      | 96.7%      | 98.2%      | 99.1%      |
|                   | <b>.15</b> | 82.6%                                                        | 88.7%      | 93.0%      | 95.8%      | 97.6%      |

724  
 725

|                   |            | <b>Difference in probability between intervention and UC</b> |            |            |            |            |
|-------------------|------------|--------------------------------------------------------------|------------|------------|------------|------------|
|                   |            | <b>.10</b>                                                   | <b>.11</b> | <b>.12</b> | <b>.13</b> | <b>.14</b> |
| <b>ICC=.05</b>    |            |                                                              |            |            |            |            |
|                   | <b>.05</b> | 93.2%                                                        | 96.1%      | 97.8%      | 98.8%      | 99.4%      |
| <b>Prob in UC</b> | <b>.10</b> | 82.6%                                                        | 88.5%      | 92.7%      | 95.5%      | 97.3%      |
|                   | <b>.15</b> | 73.2%                                                        | 80.7%      | 86.7%      | 91.1%      | 94.3%      |

726  
 727  
 728  
 729  
 730 **2.6. Cost Analysis**

731 Our cost analysis will assess the costs and long-term cost-effectiveness of the Enhanced Auto Intervention,  
 732 relative to usual care. The second primary outcome is an analysis of the cost, cost-effectiveness, and return  
 733 on investment. The goal of cost-effectiveness analysis is to select the strategy that yields the greatest  
 734 incremental health benefits per additional dollar spent.

735  
 736 **Incremental cost-effectiveness:** The measure of promotion success is how many members of the eligible  
 737 population obtain screening. The difference in cost over the difference in effectiveness of a new  
 738 intervention vs. standard care is the incremental cost-effectiveness of the new intervention, derived as:

739  
 740 
$$\text{Incremental Cost-Effectiveness New} = (C_{\text{New}} - C_{\text{Std}}) / (E_{\text{New}} - E_{\text{Std}})$$

741  
 742 where C<sub>New</sub> and C<sub>Std</sub> refer to average total costs, and E<sub>New</sub> and E<sub>Std</sub> refer to average total effectiveness  
 743 for the new and standard arms, respectively. We denote the total cost of screening as C<sub>screen</sub>. Screening  
 744 promotion programs also have a per-person denoted as C<sub>promote</sub>. By reducing the incidence of advanced

745 cancers, screening can reduce the cost of treating cancer in those who were destined to develop the  
746 disease, denoted as  $C_{cancer}$ . Total costs for a particular screening + promotion program A are:

$$747 \quad CA = [C_{sreenA} + C_{promoteA} - C_{cancerA}]$$

749  
750  
751 By reducing the incidence of advanced cancers, screening technologies increase the number of life years  
752 (LY) for a population, less any morbid or mortal side effects of the screening intervention. Thus, in  
753 comparing two screening promotion programs, the incremental cost-effectiveness of new program A versus  
754 the established program B is:

$$755 \quad \text{Incremental Cost-Effectiveness Program A} = (CA - CB) / (LYA - LYB)$$

757  
758 We will report cost-effectiveness as cost per additional screenee and cost per LY gained (note that cost per  
759 additional screenee does not include  $C_{sreenA}$  or  $C_{cancerA}$  and the denominator is total number of persons  
760 in each population obtaining screening rather than LY). Since realization of the benefits of screening  
761 promotion programs will take years or even decades, direct evaluation of the impact of promotion from the  
762 trial on LY is infeasible.

763  
764 **Costs associated with promotion ( $C_{promotion}$ ):** We will document the non-research costs associated with  
765 implementing the CRC screening intervention. These include associated fixed costs (i.e., those unrelated to  
766 the size of the target group) and variable costs. Fixed costs include implementation costs (e.g., staff  
767 training), maintenance, office space used in the clinic, equipment and materials (e.g., computers), and  
768 telephone. Variable costs include labor costs associated with delivering the interventions as well as  
769 materials distributed to the participants (e.g., FITs). Accounting systems will be used as a source of data on  
770 the cost of equipment and supplies (e.g., printing). To estimate labor costs associated with delivering the  
771 intervention, clinic staff will record the time they spend delivering intervention components (e.g., for  
772 placing FIT orders) on staff logs. Fixed and variable costs will be amortized to determine the average  
773 expenditure associated with delivering an intervention (e.g., mailing costs) to the study population  
774 ( $C_{promotion}$ ).

775  
776 **Costs of colorectal cancer screening ( $C_{screen}$ ).** Each individual who obtains screening will be assigned an  
777 associated cost, including the time-costs associated with screening, and costs for evaluation of true and  
778 false positives. Test and evaluation costs will be based on reimbursements from nationally standardized  
779 databases (e.g., Medicare reimbursements). As this is a home-based test, no time will be associated with  
780 transportation. Time spent in screening will be valued by national wage rates for individuals of the study  
781 population's age group and ethnicity. (This time is anticipated to be low.)

782  
783 **Estimating LY gained and quality-adjusted LY.** Our trial is not designed to estimate differences in CRC rates  
784 or survival for the screened population. These will need to be estimated through modeling. We propose  
785 building a Markov state transition model to estimate years of life gained and quality-adjusted LY. Three  
786 states are accounted for: healthy, CRC, and death. The healthy and CRC states are assigned a utility weight  
787 for calculating quality-adjusted LY are calculated.

788 We start with simplifying assumptions that all individuals who start screening as a result of the program will  
789 continue and those who screen have no risk for developing invasive CRC. Risk of death in each year will be  
790 determined from life tables; risk of CRC in the unscreened population will be based on epidemiological  
791 data. Those who develop CRC face a risk of death (from other causes) or death from CRC. Disease-specific  
792 survival rates for CRC will be based on Surveillance Epidemiology and End Results (SEER) survival data.(3).

793 Consistent with previous research, we will use a three percent annual rate for discounting future costs and  
 794 LY after conversion of all costs to a constant year’s dollars. We will conduct one-way and multiway  
 795 sensitivity analyses to explore the robustness of cost-effectiveness ratios to changes in assumptions.  
 796

797 **Return on investment.** Following the AHRQ Health Care Exchange recommendations, we will also present  
 798 results in an ROI format. ROI can be measured prospectively or retrospectively and has historically been  
 799 defined as the amount an organization expects to save (i.e., the difference in healthcare expenditures with  
 800 and without a specified program), compared to expected program costs. Although results are sometimes  
 801 reported as a ratio (e.g., ROI = savings/program costs, in current dollars), ratios are subject to misleading  
 802 scale effects. The preferred financial metric is “net present value” (i.e., savings less program costs, in  
 803 current dollars). In this sense, an ROI analysis is a restricted cost-benefit analysis.  
 804

805 **Learning from Phase 1:** Our Phase 1 experience will inform the Phase 2 economic evaluation, using the  
 806 following analytic plan. One objective of the economic evaluation is to categorize program labor costs by  
 807 both individual and by activity. In particular, we will refine our data collection methods, particularly as they  
 808 can greatly influence our understanding of the multiple program tasks a given individual may perform. We  
 809 will consult with the project team to appropriately categorize activities to be tracked and over what time  
 810 frame. Below is the sample data capture sheet for ongoing intervention time, centralized outreach and  
 811 management functions.  
 812

813 **Mailing** – work associated with mailing letters, FIT Kits and post cards

814 **Prep time** – work associated with planning and organizing the mailings

815 **Clinic staff meetings, PDSA and training work** – work associated with clinic meeting and training  
 816 time to launch and improve the intervention

817 **EMR changes** – work associated with requesting, specifying, testing and implementing EMR  
 818 changes associated with the intervention

819 **Administration time** – work associated with organizing meetings and logistics, preparing and  
 820 distributing meeting materials and minutes associated with the intervention.

821 **Project consultation meetings** - work associated with meetings of clinic staff with research project  
 822 staff and/or OCHIN staff

823 **Other** - other work related to ongoing delivery of the intervention but not associated with above  
 824 categories  
 825

| Ongoing Cost of STOP CRC Program                                                                 |         |           |                                 |             |            |                      |       |
|--------------------------------------------------------------------------------------------------|---------|-----------|---------------------------------|-------------|------------|----------------------|-------|
| DATA CAPTURE SHEET #2: ONGOING INTERVENTION TIME – CENTRALIZED OUTREACH AND MANAGEMENT FUNCTIONS |         |           |                                 |             |            |                      |       |
| Your Name: ( each OCHIN, VG team member fills out own sheet)                                     |         |           |                                 |             |            | Date:                |       |
| Week of:                                                                                         | Hours   |           |                                 |             |            |                      |       |
|                                                                                                  | 01      | 10        | 11                              | 41          | 45         | 40                   | Other |
| What                                                                                             | Mailing | Prep time | Clinic staff mtgs PDSA training | EMR changes | Admin Time | Project consult mtgs |       |
| 1. Centralized activities                                                                        |         |           |                                 |             |            |                      |       |

|                                           |  |  |  |  |  |  |  |
|-------------------------------------------|--|--|--|--|--|--|--|
| Produce and deliver lists                 |  |  |  |  |  |  |  |
| Prepare and mail introduction letter      |  |  |  |  |  |  |  |
| Prepare and mail FIT                      |  |  |  |  |  |  |  |
| Prepare and mail reminder card            |  |  |  |  |  |  |  |
| Prepare and mail final reminder letter    |  |  |  |  |  |  |  |
| Produce tracking reports                  |  |  |  |  |  |  |  |
| <b>2. Clinic oversight and management</b> |  |  |  |  |  |  |  |
| Lab orders tracking                       |  |  |  |  |  |  |  |
| BVtn results pool tracking                |  |  |  |  |  |  |  |
| Billing adjustments                       |  |  |  |  |  |  |  |
| PDSA mtgs                                 |  |  |  |  |  |  |  |
| OTHER                                     |  |  |  |  |  |  |  |

826

827

**2.6.1.1. Costs of Delivering the Intervention**

828

Clinic staff will incur ongoing costs as the program is implemented, including fielding incoming questions

829

from patients throughout the life of the study. They will incur costs associated with outgoing Motivational

830

Interview calls. We plan to calculate an estimate of the costs over two week-long time periods for incoming and outgoing calls and multiply that estimate times the number of calls to assess total time expended.

831

Below are sample telephone tracking logs for incoming calls and Motivational Interviewing calls.

832

833

**a. Incoming Calls**

834

i. Sampling Period 1 – after the FIT Kits are mailed – (February 6-13<sup>th</sup>)

835

ii. Sampling Period 2 – after the reminder postcard is mailed

836

**b. Outgoing MI Calls**

837

i. Sampling Period 1 – Week 1 of MI calling

838

ii. Sampling Period 2 – Week 2 of MI calling

839

|                                                                       |                                                                  |                   |         |                                                                                                       |         |
|-----------------------------------------------------------------------|------------------------------------------------------------------|-------------------|---------|-------------------------------------------------------------------------------------------------------|---------|
| <b>Sample Telephone Tracking Log for STOP CRC Incoming Calls</b>      |                                                                  |                   |         |                                                                                                       |         |
| <b>STOP CRC PHONE TIME LOG - Sampling Period One – Incoming Calls</b> |                                                                  |                   |         |                                                                                                       |         |
| <b>Date:</b>                                                          |                                                                  | <b>Your Name:</b> |         | <b>Duration of your work day:</b> <input type="checkbox"/> half day <input type="checkbox"/> full day |         |
| <b>Staff</b>                                                          | Enter tic mark for each call in appropriate call duration column |                   |         |                                                                                                       |         |
|                                                                       | Unable to Connect or <1                                          | 1-3 Min           | 3-5 Min | 5-10 Min                                                                                              | >10 Min |



|                                                                        |     |  |  |  |  |
|------------------------------------------------------------------------|-----|--|--|--|--|
|                                                                        | Min |  |  |  |  |
| <b>Client Initiated calls resolved real time or through call backs</b> |     |  |  |  |  |
| Centralized                                                            |     |  |  |  |  |
| PCC                                                                    |     |  |  |  |  |
| RN                                                                     |     |  |  |  |  |
| MA                                                                     |     |  |  |  |  |
| PCP                                                                    |     |  |  |  |  |
| Other                                                                  |     |  |  |  |  |

840  
841

|                                                                 |                                                                         |                   |                |                                                                                                       |                   |
|-----------------------------------------------------------------|-------------------------------------------------------------------------|-------------------|----------------|-------------------------------------------------------------------------------------------------------|-------------------|
| <b>Sample Telephone Tracking Log for STOP CRC MI Calls</b>      |                                                                         |                   |                |                                                                                                       |                   |
| <b>STOP CRC PHONE TIME LOG - Sampling Period One – MI Calls</b> |                                                                         |                   |                |                                                                                                       |                   |
| <b>Date:</b>                                                    |                                                                         | <b>Your Name:</b> |                | <b>Duration of your work day:</b> <input type="checkbox"/> half day <input type="checkbox"/> full day |                   |
| <b>Staff</b>                                                    | <b>Enter tic mark for each call in appropriate call duration column</b> |                   |                |                                                                                                       |                   |
|                                                                 | <b>Unable to Connect or &lt;1 Min</b>                                   | <b>1-3 Min</b>    | <b>3-5 Min</b> | <b>5-10 Min</b>                                                                                       | <b>&gt;10 Min</b> |
| <b>Clinic Initiated calls</b>                                   |                                                                         |                   |                |                                                                                                       |                   |
| RN                                                              |                                                                         |                   |                |                                                                                                       |                   |
| Other                                                           |                                                                         |                   |                |                                                                                                       |                   |

842  
843  
844

**2.7. Qualitative Data Collection**

The following table illustrates the qualitative work completed by the STOP CRC project.

| <b>Phase</b>    | <b>Description</b>                                                                                                      | <b>Method</b>   | <b>Who</b>                                                                                                                           | <b>Timeline</b>  |
|-----------------|-------------------------------------------------------------------------------------------------------------------------|-----------------|--------------------------------------------------------------------------------------------------------------------------------------|------------------|
| <b>Adoption</b> | Organizational survey circulated to gain a readiness picture of the participating clinics.                              | Survey          | 1 survey per health center completed by a combination of project lead, medical director, operations director, EMR specialist, or QI. | Summer/Fall 2014 |
|                 | Leadership Interview related to what health centers do regarding CRC screening and how they feel about implementing the | Phone Interview | 3-5 completed per health center with a project lead, medical director, CFO, EMR specialist, QI, nurse manager,                       | Summer/Fall 2014 |

|                           |                                                                                                                                  |                                                                     |                                                                                                                                      |                             |
|---------------------------|----------------------------------------------------------------------------------------------------------------------------------|---------------------------------------------------------------------|--------------------------------------------------------------------------------------------------------------------------------------|-----------------------------|
|                           | upcoming STOP CRC program and related activities.                                                                                |                                                                     | etc.                                                                                                                                 |                             |
|                           | Provider Survey was circulated to gather provider attitudes and beliefs about crc screening.                                     | Survey via Survey Monkey                                            | Qualifying providers at all clinics were invited to complete a survey via Survey Monkey.                                             | Winter 2014                 |
| <b>Implementation</b>     | Observation of PDSA trainings.                                                                                                   | Observation/doc<br>umentation                                       | Clinic teams                                                                                                                         | Winter 2014/<br>Spring 2015 |
|                           | Observations of control clinic roll out trainings.                                                                               | Observation/doc<br>umentation                                       | Clinic teams                                                                                                                         | Summer 2015                 |
|                           | Interview project leads to understand concerns and thoughts about sustainability.                                                | Phone interview                                                     | All project leads at the intervention sites.                                                                                         | Summer 2015                 |
| <b>Maintenance</b>        | Leadership meetings to discuss lessons learned and present intervention/control activity data; discuss plans for sustainability. | In-person presentation by the Investigator and Project Coordinator. | Conducted at all intervention sites with project leads, QI specialists, Medical Director, etc.                                       | Spring 2016                 |
|                           | Organizational Survey (follow-up) regarding STOP CRC implementation and roll out efforts.                                        | Survey                                                              | 1 survey per health center completed by a combination of project lead, medical director, operations director, EMR specialist, or QI. | Winter 2015                 |
|                           | Leadership Survey (follow-up) regarding STOP CRC implementation and roll out efforts.                                            | Survey                                                              | 3-5 per health center completed by a project lead, medical director, EMR specialist, or QI.                                          | Winter 2015                 |
|                           | Provider Survey (follow-up) was circulated to gather provider attitudes and beliefs about CRC screening.                         | Survey via Survey Monkey                                            | Qualifying providers at all clinics were invited to complete a survey via Survey Monkey.                                             | Winter 2015/<br>Spring 2016 |
| <b>Patient interviews</b> | Interview responders and non-responders. Understand persistent barriers and facilitators to CRC screening.                       | Phone Interview                                                     | 40 Clinic patients (English and Spanish speakers)                                                                                    | Summer 2016                 |

| Other                            |                                                                                                                                                                           |                             |                                                                                                                                                                                       |             |
|----------------------------------|---------------------------------------------------------------------------------------------------------------------------------------------------------------------------|-----------------------------|---------------------------------------------------------------------------------------------------------------------------------------------------------------------------------------|-------------|
| Non-participating health centers | Organizational surveys and interviews were used to understand the Health Center's decision to not participate in STOP CRC, and their activities to address CRC screening. | Survey and phone interviews | 1 survey per health center to be completed by operations or medical director and 6 Interviews with clinic supervisors, operations director, medical director, QI, and office manager. | Spring 2015 |

845  
846 Materials that support the qualitative process are provided in Appendix P; findings from the qualitative  
847 interviews and surveys conducted are provided in Appendix F.  
848

849 **2.8. Data Auditing and Validation**

850 Data auditing will be conducted at OCHIN through a partnership between OCHIN and CHR. The process of  
851 validation and audits is as follows:

- 852 1. Identify CHR auditor to complete work (Note that CHR will ensure IRB approval for CHR audit  
853 personnel to access OCHIN data.) and determine potential schedule of auditor
- 854 2. Review OCHIN audit capabilities and finalize audit forms for use by CHR auditor
- 855 3. Train auditor
- 856 4. OCHIN will secure a workspace for CHR auditor at OCHIN
- 857 5. Have auditor complete OCHIN HIPAA training and sign confidentiality agreement
- 858 6. OCHIN will assist CHR auditor to be able to start validation activities:
  - 859 a. Create dataset for use by auditor (patient identifiers blinded)
  - 860 b. Instruct auditor on storage of electronic audit forms (where validation data should be  
861 stored)
  - 862 c. Compare OCHIN end-user data and EPIC chart data
  - 863 d. Prepare reports for data team and investigators

864  
865  
866 **2.8.1. Validating Patient Selection using Inclusion/Exclusion Criteria (November 2014):**

867 The intended purpose of this validation was to inform the accuracy and completeness of EMR codes and  
868 processes for selecting eligible patients for the study. Discrepancies in eligibility using codes vs. chart audit  
869 would identify systematic issues with codes or processes, determine if the codes list is complete to  
870 accurately select eligible patients for the intervention (and a similar group of patients for usual care), etc.

- 871 • Given the delay in rollout, the validation was not performed prior to roll-out, thus the original aim  
872 is no longer relevant. Instead, the validation serves as an assessment of our patient selection codes  
873 and processes at a snapshot in time; with that snapshot reflecting varying degrees of data cleanup  
874 per the work we've been doing with each site.  
875

876 **2.8.2. Chart Audits of Participating Clinic Organizations**

877 For each participating clinic organization, we will apply our inclusion and exclusion criteria and select 20  
878 patients for a chart audit. The audit will address the following variables:

- 879 • Date of Birth
- 880 • Date of most recent office visit

- 881 • FIT/FOBT order, result, code, date
- 882 • Flexible sigmoidoscopy order, result, code, data
- 883 • Recorded colonoscopy referral, order or result, date and field where found
- 884 • Interval for next colonoscopy
- 885 • GI referral date, reason and field where found
- 886 • History of colorectal disease
- 887 • History of ESRD
- 888 • History of hospice or SNF

889 Audit forms were created for the pilot and will be modified for use throughout the project. Below is a  
 890 sample of the audit form used for validating clinic data.  
 891

|                                                                                                                                                                               | Sample                               | 1 |
|-------------------------------------------------------------------------------------------------------------------------------------------------------------------------------|--------------------------------------|---|
| Reviewer                                                                                                                                                                      | Amanda                               |   |
| Date of audit                                                                                                                                                                 | 7/15/2013                            |   |
| Clinic                                                                                                                                                                        | Hillsboro                            |   |
| Study ID                                                                                                                                                                      | abcde                                |   |
| Gender                                                                                                                                                                        |                                      |   |
| Date of Birth                                                                                                                                                                 | 1/23/1945                            |   |
| Date of most recent office visit                                                                                                                                              | 1/15/2012                            |   |
| <b>Colonoscopy Ever or Flex Sig: ICD-9: 45.22, 45.23, 45.25, 45.42, 45.43</b>                                                                                                 |                                      |   |
| <b>CPT/Procedure Codes: 44388-44394, 44397, 45355, 45378-45387, 45391, 45392 G0105, G0121 - Virtual Colonoscopy: 0066T, 0067T 74261-74263</b>                                 |                                      |   |
| <b>Flex Sig: ICD-9 45.24 or CPT - 45330, 45331, 45332, 45333, 45334, 43335, 45337, 45338, 45339, 45340, 45341, 45342, 45345, G0104; OCHIN Codes - V15.29, V72.85, lmo0001</b> |                                      |   |
| yes/no (Flex or Colonoscopy)                                                                                                                                                  | yes                                  |   |
| Date of most recent colonoscopy (order or result)                                                                                                                             | 6/15/2008                            |   |
| Copy of procedure within the chart?                                                                                                                                           | no                                   |   |
| Field where found                                                                                                                                                             | encounter                            |   |
| Codes or text used                                                                                                                                                            | colonoscopy ordered at GI associates |   |
| Interval for next colonoscopy; if yes, where recommendation was found.                                                                                                        | no colonoscopy scan in chart         |   |
| yes/no                                                                                                                                                                        | yes                                  |   |
| Date of most recent GI referral                                                                                                                                               | 5/1/2007                             |   |

|                                                                                                 |              |  |
|-------------------------------------------------------------------------------------------------|--------------|--|
| Reason for referral (diagnosis associated if available)                                         | none         |  |
| Field where found                                                                               | encounter    |  |
| <b>FIT/FOBT in January 13 2012-July 31, 2013 - CPT Codes: 45.22, 45.23, 45.25, 45.42, 45.43</b> |              |  |
| Yes/no                                                                                          | yes          |  |
| Lab order code                                                                                  | 45.25        |  |
| Date of Most Recent Order                                                                       | 1/1/2007     |  |
| Resulted                                                                                        | yes          |  |
| Resulted date                                                                                   | 2/15/2007    |  |
| Resulted Positive or Negative                                                                   | positive     |  |
| Ordering Facility?                                                                              | VG Hillsboro |  |
| Facility where resulted?                                                                        | Labcorp      |  |
| Associated Diagnosis/ (code?)                                                                   | none         |  |
| Were any LOINC codes used?                                                                      | na           |  |
| <b>Comments</b>                                                                                 |              |  |

892  
893  
894  
895

The investigators will look at differences in findings in order to assess data quality and provide solutions for data recording. The table below illustrates findings from the pilot stage.

| <b>Summary of Chart Audit for Pilot Clinics, Eligibility (subjects included in the pilot)</b> | <b>Proportion</b> | <b>95% CI (Fixed effects)</b> |
|-----------------------------------------------------------------------------------------------|-------------------|-------------------------------|
| <b>Clinic A (n=40)</b>                                                                        |                   |                               |
| % correctly included                                                                          | 90%               | (75%, 97%)                    |
| % with colonoscopy (10 yrs)                                                                   | 10%               | (3%, 25%)                     |
| % with sigmoidoscopy (5 yrs)                                                                  | 0%                | (0%, 10%)                     |
| % with FIT/FOBT (1 yr)                                                                        | 0%                | (0%, 10%)                     |
| <b>Clinic B (n=40)</b>                                                                        |                   |                               |
| % correctly included                                                                          | 87.5%             | (72%, 95%)                    |
| % with colonoscopy (10 yrs)                                                                   | 12.5%             | (5%, 28%)                     |
| % with sigmoidoscopy (5 yrs)                                                                  | 0%                | (0%, 10%)                     |
| % with FIT/FOBT (1 yr)                                                                        | 0%                | (0%, 10%)                     |
| <b>All Clinics<sup>1</sup> (n=80)</b>                                                         |                   |                               |
| % correctly included                                                                          | 88.8%             | (79%, 94%)                    |
| % with colonoscopy (10 yrs)                                                                   | 11.3%             | (6%, 21%)                     |
| % with sigmoidoscopy (5 yrs)                                                                  | 0%                | (0%, 6%)                      |

896  
897  
898

|                        |    |          |
|------------------------|----|----------|
| % with FIT/FOBT (1 yr) | 0% | (0%, 6%) |
|------------------------|----|----------|

<sup>1</sup> proportions are simple average of individual clinic proportions; CIs calculated assuming a common proportion for each site (fixed effects) or allowing these proportions to vary across sites (random effects)

| <b>Summary of Chart Audit for Pilot Clinics, Exclusion (subjects excluded from pilot)</b> | <b>Proportion</b> | <b>95% CI (Fixed effects)</b> |
|-------------------------------------------------------------------------------------------|-------------------|-------------------------------|
| <b>Clinic A<sup>1</sup> (n=10)</b>                                                        |                   |                               |
| % properly excluded, any reason                                                           | 100%              |                               |
| % properly excluded, indicated reason                                                     | 90.0%             |                               |
| <b>Clinic B<sup>1</sup> (n=10)</b>                                                        |                   |                               |
| % properly excluded, any reason                                                           | 70.0%             |                               |
| % properly excluded, indicated reason                                                     | 70.0%             |                               |
| <b>All Clinics<sup>2</sup> (n=20)</b>                                                     |                   |                               |
| % properly excluded, any reason                                                           | 85.0%             | (61%, 96%)                    |
| % properly excluded, indicated reason                                                     | 80.0%             | (61%, 96%)                    |
| <b>-- colonoscopy/sigmoidoscopy exclusions (n=13)</b>                                     |                   |                               |
| % properly excluded, any reason                                                           | 92.3%             | --                            |
| % properly excluded, indicated reason                                                     | 76.9%             | --                            |
| <b>-- FIT/FOBT exclusions (n=8)</b>                                                       |                   |                               |
| % properly excluded, any reason                                                           | 75.0%             | --                            |
| % properly excluded, indicated reason                                                     | 62.5%             | --                            |
| <b>-- Colorectal Disease exclusions (n=10)</b>                                            |                   |                               |
| % properly excluded, any reason                                                           | 90.0%             |                               |
| % properly excluded, indicated reason                                                     | 40.0%             |                               |

899  
900  
901

<sup>1</sup> weighted estimates across the three sampling strata

<sup>2</sup> proportions are simple average of individual clinic proportions

902  
903  
904

We will calculate sensitivity and specificity of the data, using the chart audit as the gold standard. An assessment of data quality in the moderator variables may result in additional chart audits.

905

### **2.8.3. Comparison of Claims Data and EHR Data for CRC Screening Outcomes**

906  
907  
908  
909  
910  
911  
912  
913

We will compare Medicaid claims data to clinic EHR data for colorectal screening (colonoscopy, fecal testing, sigmoidoscopy). To do this, we will obtain a list of patients from the participating organizations that have been screened in the relevant timeframe (colonoscopy past 9 years, fecal test past 11 months, sigmoidoscopy past 4 years). Medical records of patients with a claim will be abstracted. The chart auditor will verify evidence for the procedure in the medical record and will note where it was found (e.g. problem list, surgical history). We will report the concordance between claims data and EHR data for colonoscopy, fecal testing, and flexible sigmoidoscopy.

| Summary of Chart Audit for Pilot Clinics, Outcome (subjects included in the pilot) | % with FIT/FOBT in chart | 95% CI (Fixed effects) |
|------------------------------------------------------------------------------------|--------------------------|------------------------|
| <b>Clinic A (n=30)</b>                                                             |                          |                        |
| Post intervention FIT/FOBT per EMR (n=14)                                          | 100%                     | (73%, 99%)             |
| No post intervention FIT/FOBT per EMR (n=16)                                       | 0%                       | (0%, 16%)              |
| <b>Clinic B (n=30)</b>                                                             |                          |                        |
| Post intervention FIT/FOBT per EMR (n=14)                                          | 100%                     | (73%, 99%)             |
| No post intervention FIT/FOBT per EMR (n=16)                                       | 0%                       | (0%, 16%)              |
| <b>All Clinics<sup>1</sup> (n=60)</b>                                              |                          |                        |
| Post intervention FIT/FOBT per EMR (n=28)                                          | 100%                     | (85%, 100%)            |
| No post intervention FIT/FOBT per EMR (n=32)                                       | 0%                       | (0%, 15%)              |

<sup>1</sup> proportions are simple average of individual clinic proportions; CIs calculated assuming a common proportion for each site (fixed effects) or allowing these proportions to vary across sites (random effects)

914  
915  
916

917 **2.8.4. Capture of CRC screening in Health Maintenance**

918 We plan to assess how completely CRC screening history is captured in the medical record. We will  
919 do this by comparing Health Maintenance with our list of patients excluded because of prior  
920 screening. We will do this at 4 time points: baseline, 6 months, 12 months, and 18 months.

921 We will do this in clinics selected for the intervention as well as the control clinics. This check will  
922 provide an independent assessment of whether data accuracy improvements are occurring  
923 relatively equally at intervention and usual care clinics.

924  
925

**2.9. Description of Data Sources**

926 This section generally describes all data sources and data collection instruments to be used in STOP CRC.  
927 We worked with Dr. Meredith Nahm from the National Collaboratory Coordinating Center to develop a  
928 Data Flow Diagram and have included it here. As previously noted, STOP leverages data flow from these  
929 data sources and uses existing EPIC tools to deliver the interventions (e.g. Reporting Workbench,  
930 external and internal laboratory data feeds).

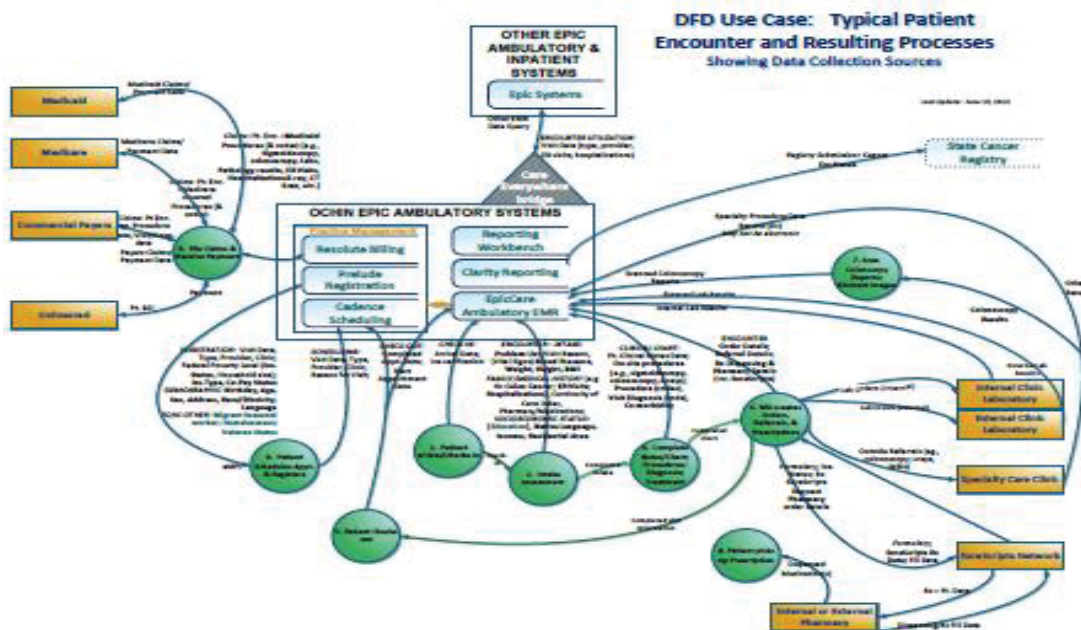

932 **2.9.1. Electronic Data from OCHIN**

933 OCHIN provides a common comprehensive information technology system to all its members. This includes  
 934 an organization-wide single EHR, through an Organized Health Care Agreement, recognized by HIPAA’s  
 935 privacy rules to allow two or more entities participating in joint activities to share patient-protected health  
 936 information. The Data Flow Diagram shows how information will be obtained for our primary outcome:  
 937 receipt of FIT/FOBT. It also shows how data will be obtained for our secondary outcomes: any type of  
 938 colorectal cancer screening. In the latter case, as colonoscopies are obtained at outside facilities, we will  
 939 work with both intervention and control sites to improve the data capture by 1) using Health Maintenance  
 940 to postpone (pending records) for patients who report previous screening during a clinic encounter; 2)  
 941 using claims Medicaid claims data to update medical records; and 3) improving clinic procedures to obtain  
 942 records from patients who are referred to Gastroenterology. These data, once obtained by the clinics, will  
 943 be extracted at OCHIN and analyzed at CHR under the direction of Dr. Bill Vollmer.

944  
 945 **2.9.2. Data Transfer Procedures**

946 OCHIN will transmit the participant data directly to CHR using a secure file transfer site. Standard Operating  
 947 Procedures (SOPs) will be developed to describe in detail the specific steps necessary for encrypting the data  
 948 files and for their secure transfer.

949  
 950 Although OCHIN has a Data Use Agreement with CHR, it covers only limited datasets. This agreement does  
 951 not allow OCHIN to give protected health information (PHI) to CHR to use for patient interviews. Therefore,  
 952 the following process must take place:

- 953  
 954  
 955
1. OCHIN will create a file containing the PHI and place it on OCHIN’s Secure File Transfer Protocol (SFTP) website, to which all OCHIN member clinics have access.
  2. The member clinic will download the file containing PHI from the SFTP



956 Limited personnel at the **clinics** have access to OCHIN’s SFTP website. These include but are not  
957 limited to Electronic Health Record Specialist (IT Support/Site Specialist), IT Support, System  
958 Administrator, and Data Analysts. For CHR to receive the data, the following process must take  
959 place:

- 960 3. Upon notice that OCHIN has uploaded file to SFTP site designated clinic staff (most likely EHR  
961 Specialist) will log onto SFTP site and download the file.
- 962 4. An EHR Specialist will upload that file into CHR SFTP website.
- 963 5. The EHR specialist will notify CHR contact upon successful file upload.
- 964 6. The EHR Specialist will delete file from the saved location or save file in secure folder on the  
965 clinic’s network.

966 Once OCHIN and the **clinics** have completed the above steps, **CHR** will complete the following  
967 process:

- 968 7. Upon notice that the **clinic** has uploaded file to SFTP site designated clinic staff will log onto  
969 SFTP site and download file
- 970 8. CHR staff will download the patient data to the file service under the appropriate folder.

971 Patient data cannot be forwarded on and must only be used as indicated in the IRB.

972

### 973 **2.9.2.1. Safeguarding and Transfer of Data Abstracted from Medical Records**

974 Data abstracted from medical records will be kept secure in all steps from the point of collection to storage at  
975 CHR.

976

## 977 **3. Dissemination Plan**

978 Our hope is that the intervention will continue well beyond the timeframe of the grant. Not only have we  
979 developed reusable materials, but we have embedded an adaptable intervention directly into the clinic  
980 process to facilitate easier adoption by other clinics. We have the following key dissemination efforts,  
981 detailed in the following sections:

- 982 • During the Phase 1 pilot, we developed several intervention materials, including an introductory  
983 letter (written in English and Spanish); wordless instructions for completing the FIT (OC Micro);  
984 wordless instruction for completing the FIT (Insure); reminder postcard (written in English and  
985 Spanish) and a clinic poster.
- 986 • With funding from Kaiser Permanente Community Benefit, we have developed a project video that  
987 showcases the STOP CRC project and the success in getting patients screened.
- 988 • We will create and maintain a project website for sharing project materials, videos, presentations,  
989 and manuscripts.
- 990 • We are hosting a webinar series, from October – December 2013 on CRC screening programs.
- 991 • We plan to develop and disseminate an implementation guide and web toolkit.
- 992 • We plan to present research findings at local and national conferences.

993

994 **3.1. Intervention Materials**

995 During the Phase 1 pilot, we developed several intervention materials: an introductory letter (written in  
996 English and Spanish); wordless instructions for completing the FIT (OC Micro); reminder postcard (written in  
997 English and Spanish), and a clinic poster. We have already shared these with a variety of health systems,  
998 including Kaiser Permanente NW, the Salem Coordinated Care Organization, and Sea Mar Community  
999 Health Centers. Each of these sites is using our wordless instructions with their FIT kits. We have an in-press  
1000 publication that describes the development of our wordless instructions and, once published, will allow for  
1001 a broader dissemination of the materials. We plan to place these on a project website so that all  
1002 participating sites can access these materials; we plan to make this website accessible to the public once  
1003 our intervention period ends.

1004 **3.2. Implementation Guide and Web-based Toolkit**

1006 The Systems of Support Study to Increase CRC Screening and Follow-up (SOS), Green –PI on which STOP is  
1007 based, protocols and materials, are being reviewed for publication on NCI’s Research Tested Intervention  
1008 Programs (RTIPs). STOP will also request a similar review and posting. Consistent with other studies, we  
1009 will draft an implementation guide based on findings from Phases I and II. It will describe the program  
1010 rationale and contain sections that orient a clinic to this program, including the following:

- 1011 • target population with inclusion and exclusion criteria;
- 1012 • minimum clinic capacity and resources (use of the EHR, use of Reporting Workbench and other  
1013 similar population management tools; Practice Management; and direct interface with  
1014 laboratory for processing FIT);
- 1015 • program objectives and strategies;
- 1016 • descriptions of CRC screening tests to help clinics select the right one;
- 1017 • barriers and facilitators to patient reach and suggested solutions.

1018 Other parts of the implementation guide will address the standard operating procedures; overall design  
1019 and methods of the CRC screening program (e.g., data querying tools, training curriculum training clinical  
1020 staff, suggested partnerships and collaborations); and other tools to support the implementation and  
1021 achievement of results (e.g., evidence-based clinical practice guidelines, patient educational materials, and  
1022 an outcome tracking plan).

1024 We will also develop forms and procedures for conducting quality assurance activities and clinic reports to  
1025 monitor compliance with the intervention protocol at each site. To assist other sites in adopting the  
1026 program, the guide will contain data algorithms for selecting eligible patients, tracking relevant CRC  
1027 outcomes and cost, and adjusting for relevant covariates (see software sharing plan). The guide will be  
1028 developed with OCHIN and participating FQHCs through an iterative refinement process. The Advisory  
1029 Board will also provide feedback on the implementation guide. We will develop a web-based toolkit to  
1030 ensure broad dissemination of our research products and findings. The toolkit will contain individual  
1031 components of the program, including materials translated into Spanish, and will be modeled after the  
1032 successful PRIMER toolkit ([www.researchtoolkit.org](http://www.researchtoolkit.org)). During Phase 1, we worked with Lara Media Services  
1033 to develop a video showcasing the success of our pilot project and its impact on patients lives.

1035 We will disseminate the implementation guide and web-based toolkit through various channels, including  
1036 (a) the leadership of other OCHIN-member clinics (presenting at monthly meetings of OCHIN organization  
1037 medical directors, board meetings of individual FQHCs, and the OCHIN retreat planned for Year 5), (b) our

1038 Advisory Group and other local stakeholders, and c) the national Collaboratory. We anticipate that the  
 1039 Coordinating Center will host a Collaboratory website where we post program products. Other possible  
 1040 websites include Research on Tested Intervention Programs (RTIPS), the Improving Chronic Illness Care  
 1041 Website (<http://www.improvingchroniccare.org/>), NCI’s Cancer Planet, and AHRQ’s Innovation Exchange.  
 1042 As colorectal cancer screening is an incentivized metric for a variety of health plans among our  
 1043 participating clinics. We will also distribute the guide and toolkit to state offices, such as the Oregon  
 1044 Health Authority and Washington State’s Governor’s Interagency Council on Health Disparities (of which  
 1045 Dr. Coronado is a member).  
 1046

1047 **3.3. Dissemination of Research Findings**

1048 We will undertake specific dissemination efforts to reach the populations that receive care at FQHCs. We  
 1049 will present at national health disparities conferences and the Migrant Stream Forum Conference.  
 1050 Dissemination of our research findings to local audiences will likely include presentations at the annual  
 1051 Latino Health Equity Conference, organized by Familias en Accion (represented on our Advisory Group), and  
 1052 the Oregon State Health Equity Committee. We will write an article for the online magazine *eSalud* (Dr.  
 1053 Coronado is a member of the editorial board) for distribution to a lay audience. We will also present our  
 1054 findings to a variety of local audiences, including Spanish-language radio stations. Dr. Coronado has hosted  
 1055 several call-in radio programs on cancer prevention topics in the past. In addition, Dr. Coronado, and Dr.  
 1056 Green, will present our finding as several national research conferences, including the Health Maintenance  
 1057 Organization Research Network conference, and the American Association for Cancer Research.  
 1058

|            | Dissemination Product                                                                                                                                    | Dissemination Plan                                                                                                                                                                                                                           |
|------------|----------------------------------------------------------------------------------------------------------------------------------------------------------|----------------------------------------------------------------------------------------------------------------------------------------------------------------------------------------------------------------------------------------------|
| UH2        | Introductory letter<br>Wordless instructions for FIT (OC Micro)<br>Wordless instructions for FIT (Insure)<br>Reminder postcard<br>Video showcasing pilot | Publish wordless instructions in scientific literature<br>Share wordless instructions to health systems and coordinated care organizations<br>Post video on project website and share with clinics and state office of equity and inclusion. |
| UH3 – YR01 | Findings from pilot                                                                                                                                      | Publish in scientific literature<br>Present at conferences<br>Post on project website                                                                                                                                                        |
| UH3 – YR02 | Findings from qualitative research                                                                                                                       | Publish in scientific literature<br>Present at conferences<br>Post on project website                                                                                                                                                        |
| UH3 – YR03 | Findings from cost analysis                                                                                                                              | Publish in scientific literature<br>Present at conferences<br>Post on project website                                                                                                                                                        |
| UH3 – YR04 | Findings from pragmatic study<br>Expand program to non-Epic clinic; draft Implementation guide                                                           | Publish in scientific literature<br>Distribute implementation guide<br>Post on project website, RTIPS and Cancer PLANET                                                                                                                      |

1059 **4. Appendix:**

1060 **4.1. Workflow Diagrams from Virginia Garcia**

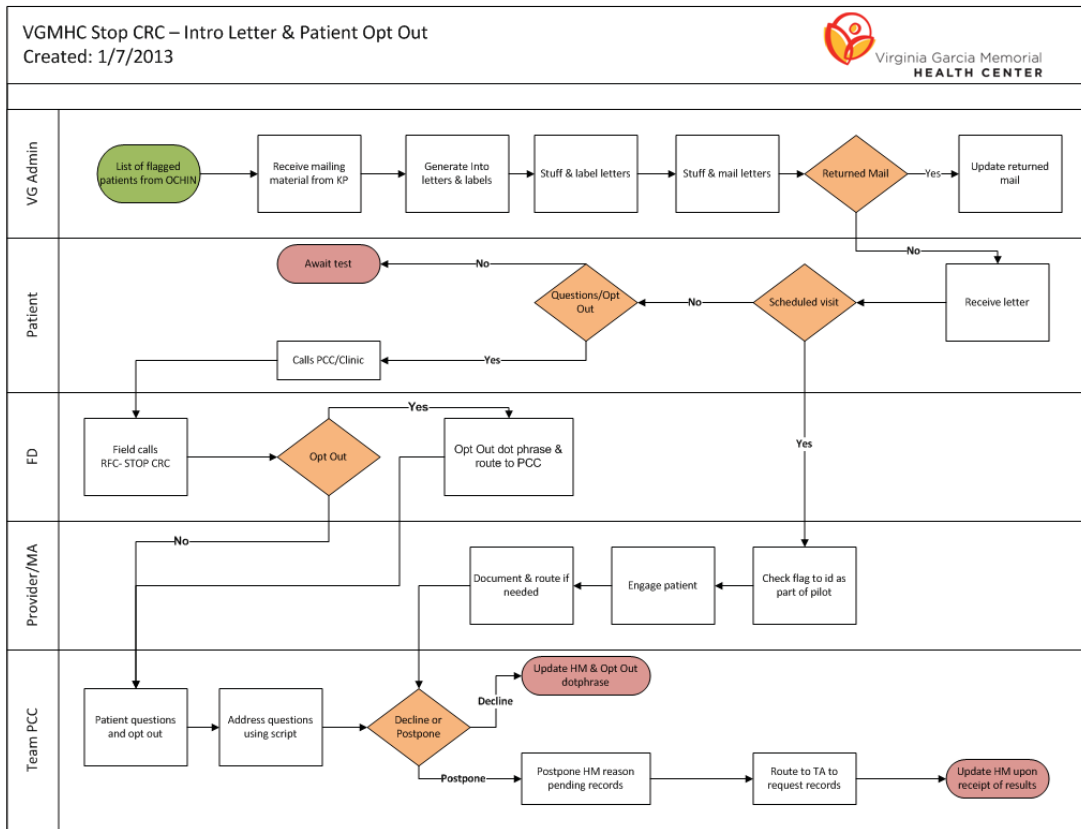

1061

VGMHC Stop CRC – Ordering FIT & Results Receipt  
 Created: 1/7/2013

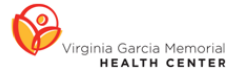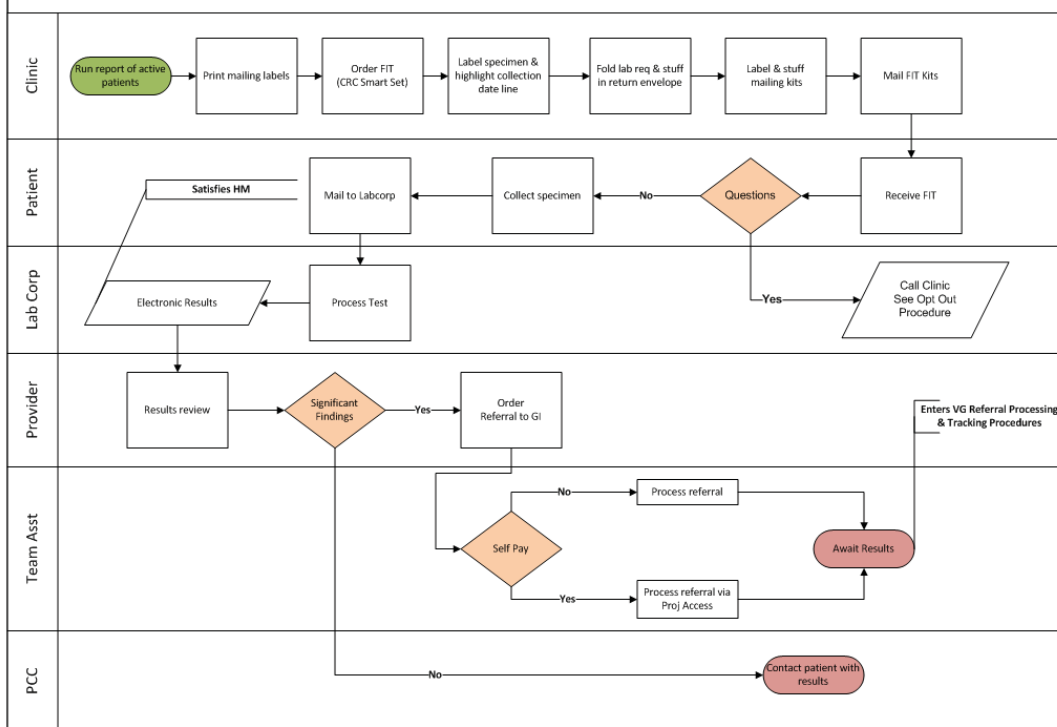

VGMHC Stop CRC – Reminder Post Card  
 Created: 1/7/2013

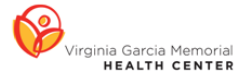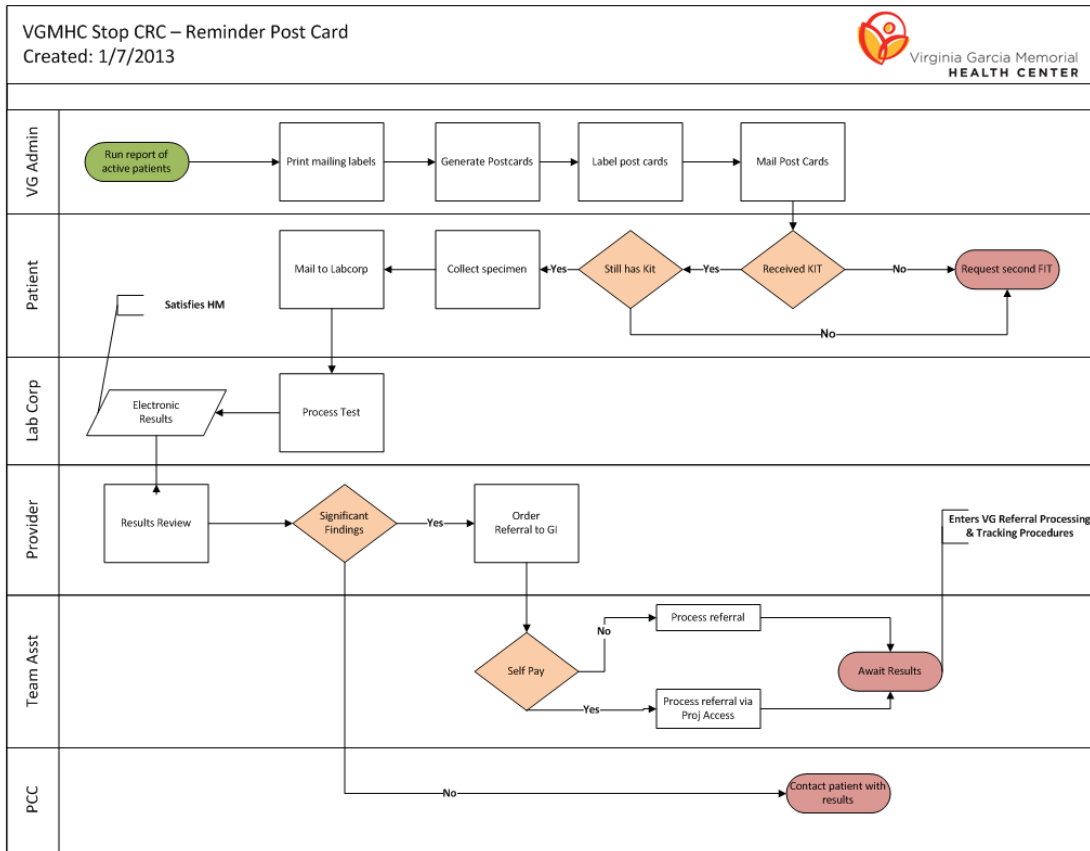

1063  
 1064

1065 **4.2. Research Reports**

1066 **4.2.1. Patient Eligibility Table**

| Patient eligibility in Intervention Clinics 1-6  | Clinic #1   | Clinic #2   | Clinic #3   | Clinic #4   | Clinic #5   | Clinic #6   | Total        |
|--------------------------------------------------|-------------|-------------|-------------|-------------|-------------|-------------|--------------|
|                                                  | N (%)        |
| Patients 50-74 with clinic visit in past year    | 500 (100.0) | 500 (100.0) | 500 (100.0) | 500 (100.0) | 500 (100.0) | 500 (100.0) | 1000 (100.0) |
| Patients with valid address                      | 226 (45.2)  | 188 (37.6)  | 188 (37.6)  | 188 (37.6)  | 188 (37.6)  | 188 (37.6)  | 414 (41.4)   |
| Excluded due to:                                 |             |             |             |             |             |             |              |
| Prior CRC Screening                              | 19 (8.4)    | 56 (24.8)   | 56 (24.8)   | 56 (24.8)   | 56 (24.8)   | 56 (24.8)   | 75 (33.2)    |
| History colorectal disease                       | 4 (1.8)     | 11 (5.9)    | 11 (5.9)    | 11 (5.9)    | 11 (5.9)    | 11 (5.9)    | 15 (3.6)     |
| Co-morbid conditions                             | 4 (1.8)     | 10 (5.3)    | 10 (5.3)    | 10 (5.3)    | 10 (5.3)    | 10 (5.3)    | 14 (3.4)     |
| Patients Eligible after exclusions               | 199 (88.1)  | 111 (59.0)  | 111 (59.0)  | 111 (59.0)  | 111 (59.0)  | 111 (59.0)  | 310 (74.9)   |
| Patient eligibility in Intervention Clinics 7-12 | Clinic #7   | Clinic #8   | Clinic #9   | Clinic #10  | Clinic #11  | Clinic #12  | Total        |
|                                                  | N (%)        |
| Patients 50-74 with clinic visit in past year    | 500 (100.0) | 500 (100.0) | 500 (100.0) | 500 (100.0) | 500 (100.0) | 500 (100.0) | 1000 (100.0) |
| Patients with valid address                      | 188 (37.6)  | 188 (37.6)  | 188 (37.6)  | 188 (37.6)  | 188 (37.6)  | 188 (37.6)  | 414 (41.4)   |
| Excluded due to:                                 |             |             |             |             |             |             |              |
| Prior CRC Screening                              | 56 (24.8)   | 56 (24.8)   | 56 (24.8)   | 56 (24.8)   | 56 (24.8)   | 56 (24.8)   | 75 (33.2)    |
| History colorectal disease                       | 11 (5.9)    | 11 (5.9)    | 11 (5.9)    | 11 (5.9)    | 11 (5.9)    | 11 (5.9)    | 15 (3.6)     |
| Co-morbid conditions                             | 10 (5.3)    | 10 (5.3)    | 10 (5.3)    | 10 (5.3)    | 10 (5.3)    | 10 (5.3)    | 14 (3.4)     |
| Patients Eligible after exclusions               | 111 (59.0)  | 111 (59.0)  | 111 (59.0)  | 111 (59.0)  | 111 (59.0)  | 111 (59.0)  | 310 (74.9)   |

1067

1068 4.2.2. Monthly Activity Summary

| Month  | Intro letter mailed | Incoming Encounter | Invalid address | Opt outs         |              |       |         | FIT kits mailed | Reminder cards sent | Fit kits complete and results | FIT kits abnormal result | Total rate FIT/FOBT Screening at Clinic | Total rate Colonoscopy Screening at Clinic |
|--------|---------------------|--------------------|-----------------|------------------|--------------|-------|---------|-----------------|---------------------|-------------------------------|--------------------------|-----------------------------------------|--------------------------------------------|
|        |                     |                    |                 | Med. Ineligible. | Prior Screen | Other | Decline |                 |                     |                               |                          |                                         |                                            |
|        |                     | N (%)              | N (%)           | N (%)            | N (%)        | N (%) | N (%)   | N (%)           | N (%)               | N (%)                         | N (%)                    | N (%)                                   |                                            |
| Jan    |                     |                    |                 |                  |              |       |         |                 |                     |                               |                          |                                         |                                            |
| Feb    |                     |                    |                 |                  |              |       |         |                 |                     |                               |                          |                                         |                                            |
| March  |                     |                    |                 |                  |              |       |         |                 |                     |                               |                          |                                         |                                            |
| April  | 200                 | 7 (3.5)            | 20 (10.0)       | 0                | 0            | 0     | 1       | 180 (90.0)      | 150 (75.0)          | 75 (37.5)                     | 0 (0.0)                  | 75 (37.5)                               | 75 (37.5)                                  |
| May    | 200                 | 8 (4.0)            | 20 (10.0)       | 0                | 0            | 0     | 0       | 180 (90.0)      | 150 (75.0)          | 80 (40.0)                     | 7 (3.5)                  | 80 (40.0)                               | 80 (40.0)                                  |
| June   | 200                 | 0 (0.0)            | 20 (10.0)       | 1                | 2            | 1     | 1       | 180 (90.0)      | 150 (75.0)          | 60 (30.0)                     | 6 (3.0)                  | 60 (30.0)                               | 60 (30.0)                                  |
| July   | 200                 | 0 (0.0)            | 20 (10.0)       | 0                | 0            | 1     | 0       | 180 (90.0)      | 150 (75.0)          | 70 (35.0)                     | 5 (2.5)                  | 70 (35.0)                               | 70 (35.0)                                  |
| Aug    | 200                 | 0 (0.0)            | 20 (10.0)       | 0                | 2            | 0     | 0       | 180 (90.0)      | 150 (75.0)          | 80 (40.0)                     | 8 (4.0)                  | 80 (40.0)                               | 80 (40.0)                                  |
| Sept   | 200                 | 0 (0.0)            | 20 (10.0)       | 1                | 4            | 1     | 1       | 180 (90.0)      | 150 (75.0)          | 60 (30.0)                     | 9 (4.5)                  | 60 (30.0)                               | 60 (30.0)                                  |
| Oct    | 200                 | 0 (0.0)            | 20 (10.0)       | 0                | 2            | 0     | 1       | 180 (90.0)      | 150 (75.0)          | 100 (50.0)                    | 7 (3.5)                  | 100 (50.0)                              | 100 (50.0)                                 |
| Nov    | 200                 | 0 (0.0)            | 20 (10.0)       | 0                | 2            | 0     | 0       | 180 (90.0)      | 150 (75.0)          | 110 (55.0)                    | 4 (2.0)                  | 110 (55.0)                              | 110 (55.0)                                 |
| Dec    | 200                 | 0 (0.0)            | 20 (10.0)       | 0                | 0            | 0     | 0       | 180 (90.0)      | 150 (75.0)          | 100 (50.0)                    | 2 (1.0)                  | 100 (50.0)                              | 100 (50.0)                                 |
| Total: | 1800                | 15 (0.8)           | 180 (10.0)      | 2                | 12           | 3     | 4       | 1620 (90.0)     | 1350 (75.0)         | 735 (40.8)                    | 48 (2.7)                 | 735 (40.8)                              | 735 (40.8)                                 |

1069

1070



1071 4.2.3. Final Disposition Status

|                                  | Clinic #1<br>N (%) | Clinic #2<br>N (%) | Clinic #3<br>N (%) | Clinic #4<br>N (%) | Clinic K<br>N (%) | Total<br>N (%) |
|----------------------------------|--------------------|--------------------|--------------------|--------------------|-------------------|----------------|
| Patients eligible for Step 1     | 200                | 300                | 400                | 112                | 200               | 3307           |
| Step 1: Mailed Intro Letters     | 112 (56.0)         | 112 (37.3)         | 112 (28.0)         | 112 (100.0)        | 112 (56.0)        | 1344 (40.6)    |
| Invalid Address                  | 10 (8.9)           | 10 (8.9)           | 10 (8.9)           | 10 (8.9)           | 10 (8.9)          | 120 (8.9)      |
| Medical ineligibility*           | 1 (0.9)            | 1 (0.9)            | 1 (0.9)            | 1 (0.9)            | 1 (0.9)           | 12 (0.9)       |
| Prior Screening                  | 0 (0.0)            | 0 (0.0)            | 0 (0.0)            | 0 (0.0)            | 0 (0.0)           | 0 (0.0)        |
| Other                            | 0 (0.0)            | 0 (0.0)            | 0 (0.0)            | 0 (0.0)            | 0 (0.0)           | 0 (0.0)        |
| Declined                         | 2 (1.8)            | 2 (1.8)            | 2 (1.8)            | 2 (1.8)            | 2 (1.8)           | 24 (20.0)      |
| Patients eligible for Step 2     | 101 (90.2)         | 101 (90.2)         | 101 (90.2)         | 101 (90.2)         | 101 (90.2)        | 1212 (90.2)    |
| Step 2: Mailed FIT Kits          | 101 (100.0)        | 101 (100.0)        | 101 (100.0)        | 101 (100.0)        | 101 (100.0)       | 1212 (100.0)   |
| Invalid Address                  | 10 (9.9)           | 10 (9.9)           | 10 (9.9)           | 10 (9.9)           | 10 (9.9)          | 120 (9.9)      |
| Medical ineligibility*           | 1 (1.0)            | 1 (1.0)            | 1 (1.0)            | 1 (1.0)            | 1 (1.0)           | 12 (1.0)       |
| Prior Screening                  | 0 (0.0)            | 0 (0.0)            | 0 (0.0)            | 0 (0.0)            | 0 (0.0)           | 0 (0.0)        |
| Other                            | 0 (0.0)            | 0 (0.0)            | 0 (0.0)            | 0 (0.0)            | 0 (0.0)           | 0 (0.0)        |
| Declined                         | 2 (2.0)            | 2 (2.0)            | 2 (2.0)            | 2 (2.0)            | 2 (2.0)           | 24 (20.0)      |
| Completed FIT Kit after mailing  | 17 (16.8)          | 17 (16.8)          | 17 (16.8)          | 17 (16.8)          | 17 (16.8)         | 204 (16.8)     |
| Patients eligible for Step 3     | 71 (70.3)          | 71 (70.3)          | 71 (70.3)          | 71 (70.3)          | 71 (70.3)         | 852 (70.3)     |
| Step 3: Mailed Reminder Postcard | 70 (98.6)          | 70 (98.6)          | 70 (98.6)          | 70 (98.6)          | 70 (98.6)         | 840 (69.3)     |
| Invalid Address                  | 10 (14.1)          | 10 (14.1)          | 10 (14.1)          | 10 (14.1)          | 10 (14.1)         | 120 (14.3)     |
| Medical ineligibility*           | 1 (1.4)            | 1 (1.4)            | 1 (1.4)            | 1 (1.4)            | 1 (1.4)           | 12 (1.4)       |
| Prior Screening                  | 0 (0.0)            | 0 (0.0)            | 0 (0.0)            | 0 (0.0)            | 0 (0.0)           | 0 (0.0)        |
| Other                            | 0 (0.0)            | 0 (0.0)            | 0 (0.0)            | 0 (0.0)            | 0 (0.0)           | 0 (0.0)        |
| Declined                         | 0 (0.0)            | 0 (0.0)            | 0 (0.0)            | 0 (0.0)            | 0 (0.0)           |                |

|                                                                                 |           |           |           |           |           |             |
|---------------------------------------------------------------------------------|-----------|-----------|-----------|-----------|-----------|-------------|
| Completed FIT kits after reminder postcards*                                    | 21 (29.6) | 21 (29.6) | 21 (29.6) | 21 (29.6) | 21 (29.6) | 252 (29.6)  |
| FIT kits returned (within 3 months of FIT kit mailing)                          | 38 (37.6) | 38 (37.6) | 38 (37.6) | 38 (37.6) | 38 (37.6) | 456 (37.6)  |
| FIT kits returned (more than 3 months after FIT kit mailing)                    | 10 (9.9)  | 10 (9.9)  | 10 (9.9)  | 10 (9.9)  | 10 (9.9)  | 120 (100.0) |
| Total FIT kits returned within 10 months of mailing FIT kit                     | 48 (47.5) | 48 (47.5) | 48 (47.5) | 48 (47.5) | 48 (47.5) | 576 (47.5)  |
| Test results (relative to kits returned)                                        |           |           |           |           |           |             |
| Positive                                                                        | 4 (10.5)  | 4 (10.5)  | 4 (10.5)  | 4 (10.5)  | 4 (10.5)  | 5(1.1)      |
| Negative                                                                        | 34 (89.5) | 34 (89.5) | 34 (89.5) | 34 (89.5) | 34 (89.5) | 34 (7.5)    |
| Unusable kit                                                                    | 0 (0.0)   | 0 (0.0)   | 0 (0.0)   | 0 (0.0)   | 0 (0.0)   | 0 (0.0)     |
| Colonoscopy/ Flex Sig referrals as follow-up to positive FITS (within 6 months) |           |           |           |           |           |             |
| Colonoscopies/ Flex Sig completed (within 6 months)                             |           |           |           |           |           |             |
| TOTAL FIT/FOBT Return Rate in past 12 months                                    |           |           |           |           |           |             |
| TOTAL Colonoscopy Rate in past 12 months                                        |           |           |           |           |           |             |

\*Medically ineligible include conditions that prompt direct referral to GI, such as ulcerative colitis, Crohn's disease, and immediate family history of colorectal cancer; patient under hospice care, or otherwise medically ineligible for fecal testing.

.\*% reflected is of patients eligible after exclusions.

1072  
1073

1074  
1075

**4.2.4. Patient Eligibility and Outcomes in Usual Care Clinics**

|                                               | Clinic #1  | Clinic #2  | Clinic #3  | Clinic #4  | Clinic K   | Total       |
|-----------------------------------------------|------------|------------|------------|------------|------------|-------------|
|                                               | N (%)       |
| Patients 50-74 with clinic visit in past year | 500 (100)  | 500 (100)  | 500 (100)  | 500 (100)  | 500 (100)  | 6000 (100)  |
| Patients with valid address                   | 226 (45.2) | 188 (37.6) | 188 (37.6) | 188 (37.6) | 188 (37.6) | 2294 (38.2) |
| Excluded due to:                              |            |            |            |            |            |             |
| Prior CRC Screening                           | 19 (8.4)   | 56 (24.8)  | 56 (24.8)  | 56 (24.8)  | 56 (24.8)  | 635 (28.1)  |
| History of colorectal disease                 | 4 (1.8)    | 11 (5.9)   | 11 (5.9)   | 11 (5.9)   | 11 (5.9)   | 125 (5.4)   |
| Co-morbid conditions                          | 4 (1.8)    | 10 (5.3)   | 10 (5.3)   | 10 (5.3)   | 10 (5.3)   | 114 (5.0)   |
| Patients Eligible after exclusions            | 199 (88.1) | 111 (59.0) | 111 (59.0) | 111 (59.0) | 111 (59.0) | 1420 (61.9) |
| TOTAL FIT/FOBT Return Rate in past 12 months  | 20 (10.1)  | 20 (18.0)  | 20 (18.0)  | 20 (18.0)  | 20 (18.0)  | 240 (16.9)  |
| TOTAL Colonoscopy Rate in past 12 months      | 5 (2.5)    | 5 (4.5)    | 5 (4.5)    | 5 (4.5)    | 5 (4.5)    | 60 (4.2)    |
