# Supplementary material
Source: PubMed Central journal article supplement (PMC6142956)
Supplement: jamainternmed-178-1174-s002.pdf [file jamainternmed-178-1174-s002.pdf]

## Supplementary Online Content

Coronado GD, Petrik AF, Vollmer WM, et al. Effectiveness of a mailed colorectal cancer screening outreach program in community health clinics: the STOP CRC Cluster randomized pragmatic clinical trial [published online August 6, 2018]. *JAMA Intern Med*. doi: 10.1001/jamainternmed.2018.3629

**eTable.** Clinic-level distribution of intervention activities delivered in intervention clinics, in primary and lagged datasets

This supplementary material has been provided by the authors to give readers additional information about their work.

**eTable.** Clinic-level distribution of intervention activities delivered in intervention clinics, in primary and lagged datasets

|                                                | <b>Primary dataset</b>    | <b>Lagged dataset <sup>a</sup></b> |
|------------------------------------------------|---------------------------|------------------------------------|
| <b>Intervention Activities</b>                 | <b>N clinics (n = 13)</b> | <b>N clinics (n = 13)</b>          |
| <b>STEP 1</b>                                  |                           |                                    |
| Mailed Intro letter (clinic median (range))    | 33% (3%-72%)              | 47% (18%-85%)                      |
| < 25%                                          | 4                         | 2                                  |
| 25 < 50%                                       | 7                         | 6                                  |
| 50% +                                          | 2                         | 5                                  |
| <b>STEP 2</b>                                  |                           |                                    |
| Ordered FIT kit (clinic median (range))        | 30% (3%-68%)              | 42% (18%-82%)                      |
| < 25%                                          | 6                         | 2                                  |
| 25 < 50%                                       | 5                         | 7                                  |
| 50% +                                          | 2                         | 4                                  |
| <b>STEP 3</b>                                  |                           |                                    |
| Mailed reminder letter (clinic median (range)) | 19% (0%-60%)              | 26% (0%-71%)                       |
| < 25%                                          | 7                         | 4                                  |
| 25 < 50%                                       | 5                         | 7                                  |
| 50% +                                          | 1                         | 2                                  |

<sup>a</sup> delays participant accrual for four months
